1 **Hybrid immunity from SARS-CoV-2 infection and vaccination in Canadian**  
2 **adults: cohort study**

3  
4 Patrick E. Brown<sup>1</sup>, Sze Hang Fu<sup>1</sup>, Leslie Newcombe<sup>1</sup>, Xuyang Tang<sup>1</sup>, Nico Nagelkerke<sup>1</sup>, H Chaim Birnboim<sup>1</sup>, Aiyush  
5 Bansal<sup>1</sup>, Karen Colwill<sup>2</sup>, Geneviève Mailhot<sup>2</sup>, Melanie Delgado-Brand<sup>2</sup>, Tulunay Tursun<sup>2</sup>, Freda Qi<sup>2</sup>, Anne-Claude  
6 Gingras<sup>2</sup>, Arthur S. Slutsky<sup>3</sup>, Maria D. Pasic<sup>3</sup>, Jeffrey Companion<sup>3</sup>, Isaac I. Bogoch<sup>4</sup>, Ed Morawski<sup>5</sup>, Teresa Lam<sup>5</sup>, Angus  
7 Reid<sup>5</sup>, Prabhat Jha<sup>1\*</sup>, Ab-C Study Collaborators

8  
9 <sup>1</sup>Centre for Global Health Research, Unity Health Toronto and University of Toronto, Toronto, Canada; <sup>2</sup>Lunenfeld-  
10 Tanenbaum Research Institute, Sinai Health, Toronto, Canada; <sup>3</sup>Unity Health Toronto, Toronto, Canada; <sup>4</sup>Toronto  
11 General Hospital, University Hospital Network, Toronto, Canada; <sup>5</sup>Angus Reid Institute, Vancouver, Canada

12  
13 **\*For correspondence:** [prabhat.jha@utoronto.ca](mailto:prabhat.jha@utoronto.ca)

14  
15 Abstract: 291

16 Main text: 2079

17 4 figures and 1 table

18 Supplementary material: 5 figures and 1 table

19 References: 25

20 **Abstract**

21 Background:

22 Few national-level studies have evaluated the impact of “hybrid” immunity (vaccination coupled with  
23 recovery from infection) from the Omicron variants of SARS-CoV-2.

24

25 Methods:

26 From May 2020 to December 2022, we conducted serial assessments (each of ~4000-9000 adults)  
27 examining SARS-CoV-2 antibodies within a mostly representative Canadian cohort drawn from a  
28 national online polling platform. Adults, most of whom were vaccinated, reported viral test–confirmed  
29 infections and mailed self-collected dried blood spots to a central lab. Samples underwent highly  
30 sensitive and specific antibody assays to spike and nucleocapsid protein antigens, the latter triggered  
31 only by infection. We estimated cumulative SARS-CoV-2 incidence prior to the Omicron period and  
32 during the BA.1/1.1 and BA.2/5 waves. We assessed changes in antibody levels and in age-specific  
33 active immunity levels.

34

35 Results:

36 Spike levels were higher in infected than in uninfected adults, regardless of vaccination doses. Among  
37 adults vaccinated at least thrice and infected more than six months earlier, spike levels fell notably and  
38 continuously for the nine months post-vaccination. By contrast, among adults infected within six  
39 months, spike levels declined gradually. Declines were similar by sex, age group, and ethnicity. Recent  
40 vaccination attenuated declines in spike levels from older infections. In a convenience sample, spike  
41 antibody and cellular responses were correlated. Near the end of 2022, about 35% of adults above age  
42 60 had their last vaccine dose more than six months ago, and about 25% remained uninfected. The  
43 cumulative incidence of SARS-CoV-2 infection rose from 13% (95% CI 11-14%) before omicron to 78%  
44 (76-80%) by December 2022, equating to 25 million infected adults cumulatively. However, the COVID-  
45 19 weekly death rate during the BA.2/5 waves was less than half of that during the BA.1/1.1 wave,  
46 implying a protective role for hybrid immunity.

47

48 Conclusions:

49 Strategies to maintain population-level hybrid immunity require up-to-date vaccination coverage,  
50 including among those recovering from infection. Population-based, self-collected dried blood spots  
51 are a practicable biological surveillance platform.

52

53 Funding:

54 Funding was provided by the COVID-19 Immunity Task Force, Canadian Institutes of Health Research,  
55 Pfizer Global Medical Grants, and St. Michael’s Hospital Foundation. PJ and ACG are funded by the  
56 Canada Research Chairs Program.

57

## 58 Introduction

59 Infection with the Omicron BA.1/1.1 variant of the SARS-CoV-2 virus occurred worldwide late in 2021  
60 and in early 2022. “Hybrid” immunity (vaccination coupled with recovery from infection) has emerged  
61 as a major determinant of the lower burden of COVID-19 morbidity and mortality in 2022 compared to  
62 2020 or 2021.<sup>1,2</sup>

63  
64 Epidemiological studies have identified hybrid immunity as partially protective against infection or  
65 reinfection, and more strongly protective against hospitalization, severe disease, or death.<sup>1-3</sup> However,  
66 such studies rely on the follow-up of hospitalized patients or those with access to PCR-based testing,  
67 and not randomly selected populations. Thus, the contribution of infection and vaccination to hybrid  
68 immunity and the duration of immunity from either exposure remain remarkably poorly documented  
69 at the population level.<sup>4-7</sup>

70  
71 Development of strategies to move from pandemic to endemic management of COVID-19 will be  
72 greatly enabled by evidence of population-level immunity, which ideally should be informed by  
73 changes over time in biologic measures of immunologic protection (antibody levels, infection status,  
74 vaccination, and healthcare utilization). Humoral antibody levels, which correlate strongly with cellular  
75 immunity,<sup>8</sup> are the most practical method to monitor populations.

76  
77 Canada provides an opportunity to document hybrid immunity. Although reaching high levels of  
78 vaccination reasonably quickly (by September 2021), Canada experienced a large increase in infections  
79 from Omicron from December 2021, even among vaccinated people.<sup>9</sup> Vaccines used in Canada (mostly  
80 the mRNA and some adenovirus vaccines) trigger antibody responses to the SARS-CoV-2 spike protein  
81 and its receptor-binding domain (RBD), but not to the nucleocapsid protein (N).<sup>10</sup> This enables  
82 serological distinction of infection from vaccination.

83  
84 In this study, we estimate cumulative SARS-CoV-2 incidence among Canadian adults in 2020<sup>4</sup> and 2021  
85 - prior to the Omicron period - and during two major Omicron waves (BA.1/1.1 and BA.2 and BA.5) in  
86 2022.<sup>5</sup> We assess declines in active immunity and changes over time in age-specific active immunity  
87 levels based on prior infection and concurrent vaccination.

## 88 89 Results

90 We examined three time periods: (i) March 2020 to December 2021 when Canada faced waves of  
91 ancestral, Alpha, and Delta variants of SARS-CoV-2; (ii) January-March 2022 during the Omicron  
92 BA.1/1.1 wave; and (iii) April-December 2022 during the Omicron BA.2 and BA.5 waves. Figure 1  
93 provides the timeline for Phases 1 to 6, in relation to national weekly averages of confirmed COVID-19  
94 cases and weekly averages of vaccination from any dose.

95  
96 We surveyed 10 088 adults in Phase 6 of Ab-C, of whom 4025 provided DBS from 26 September to 21  
97 November 2022, and of whom 3378 provided both surveys and DBS. Study participants were

98 comparable to Canadian adults in prevalence of obesity, smoking, diabetes, and vaccination, but fewer  
99 lower-education adults participated (supplementary table S1). More females and vaccinated adults  
100 provided DBS in Phase 6. Lack of vaccination and lower education were correlated (supplementary  
101 methods), so we adjusted cumulative incidence for vaccination status. The characteristics of the cohort  
102 were stable between Phases 3, 4, and 6 (supplementary table S1), so changes in antibody levels are  
103 unlikely to be confounded by differential recruitment in each phase.<sup>4,5</sup>

104  
105 Canada had four major viral waves before December 2021 and a major increase in vaccination  
106 coverage with two doses peaking in early July 2021 (fig 1). A large Omicron BA.1/1.1 wave of January-  
107 March 2022 coincided with a large increase in vaccination, mostly of third (booster) doses. The six Ab-C  
108 phases captured Canada's major infection and vaccination peaks in a reasonably timely manner.

109  
110 Spike levels were higher in infected than in uninfected adults, regardless of vaccination doses (fig 2).  
111 Spike levels were higher among those who were infected and vaccinated, and lowest among the very  
112 few who were immune naïve or had only one vaccine dose or infection without vaccination.  
113 Uninfected adults with four vaccine doses were similar in spike level distribution to infected adults with  
114 only two or three vaccine doses. Results using the RBD protein were similar (supplementary figure S3).

115  
116 Among adults vaccinated at least thrice and infected more than six months earlier, spike levels fell  
117 notably and continuously for the nine months post-vaccination (fig 3). By contrast, among adults  
118 infected within six months, the decline in spike levels was more gradual. Declines were similar by sex,  
119 by age group (15-59 years or 60+ years), and among various ethnicities (including visible minorities and  
120 Indigenous populations). Vaccination within six months boosted spike levels from older infections that  
121 would have otherwise fallen, yielding similar spike levels among adults infected more than six months  
122 ago or infected within six months (supplementary figure S4). Stratifying by periods of 2 months or less,  
123 3-5 months, and 6 or more months yielded comparable results, albeit with smaller numbers in each  
124 stratum (data not shown).

125  
126 Among a convenience sample of 39 adults, all 32 vaccinated adults had positive spike T-cell responses.  
127 The T-cell titers and spike antibody levels correlated (supplementary figure S5).

128  
129 Applying the Ab-C results, after standardizing for vaccination status, region, age, and sex to the  
130 national profile of Canadian adult population, yielded estimates of cumulative incidence of SARS-CoV-2  
131 infection rising from about 13% before Omicron to 78% by December 2022. This equates to about 25  
132 million infected adults cumulatively. Canada had about 50 000 COVID deaths from March 2020 to  
133 December 2022, corresponding to about 6% higher mortality at all ages versus background death  
134 rates.<sup>17</sup> Over 90% of Canadian COVID deaths occurred above age 60 years.<sup>9</sup> Despite the rising  
135 cumulative incidence, the COVID-19 weekly death rate per million population during the Omicron  
136 BA.2/5 waves (7.7) was less than half of the weekly death rate during the Omicron BA.1/1.1 wave

137 (16.6). This suggests that hybrid immunity played a role in reducing severe disease and deaths (Table  
138 1).

139

140 There were marked increases in infection among younger (18-59 years) and older (60+ years) mostly  
141 vaccinated adults, rising from about 11% in each age group by August 2021 to about 86% and 75%,  
142 respectively, by December 2022 (fig 4). However, fully 35% of adults above age 60, who are most at  
143 risk of hospitalization or death, had their last vaccine dose more than six months ago, and about 25%  
144 remained uninfected.

145

## 146 **Discussion**

147 We demonstrate the protective nature of hybrid immunity at a population level using robust biological  
148 markers of cumulative infection paired with viral testing. While steps to protect individuals and  
149 populations from SARS-CoV-2 infection must continue to be implemented, close to 80% of Canadian  
150 adults became infected, mostly from the Omicron variants, by December 2022. This led to notable  
151 morbidity and mortality, but also led to population-level hybrid immunity.

152

153 Despite a marked increase in cumulative infection, COVID-19 death rates during Omicron BA.2 and  
154 BA.5 were markedly lower than during BA.1/1.1, likely reflecting protection against severe disease  
155 from hybrid immunity (despite lower protection against reinfection). Canadian healthcare systems  
156 were overburdened with COVID-related hospitalizations several times during the pandemic. Since  
157 summer 2022, hospitalizations have eased significantly, most notably with fewer admissions to  
158 intensive care units following the initial Omicron BA.1/1.1 wave.<sup>9</sup> Differences in pathogenicity of  
159 successive Omicron variants are likely too small<sup>18</sup> to explain the differences in COVID-19 death rates.

160

161 We showed that absent recent infection, spike levels declined up to nine months, but reassuringly,  
162 declines were comparable in older versus younger adults and by sex and ethnicity. Importantly, recent  
163 vaccination attenuated the declines in spike levels from older infections. Obviously, reliance on  
164 infections is unwise to boost immunity, especially for those most vulnerable to severe COVID-19.

165 Collectively, our and other studies on hybrid immunity<sup>1-5,7,19</sup> suggest that older adults may require  
166 access to booster doses at 6 to 12-month intervals, and prior to possible seasonal waves. Strategies to  
167 maintain population-level hybrid immunity require high vaccination coverage, including among those  
168 who have recovered from infection and the few remaining unvaccinated.

169

170 The Ab-C study is one of the few nationally representative serosurveys to measure hybrid immunity  
171 objectively,<sup>5-7</sup> and has the benefit of sampling the entire population. Large increases from Omicron  
172 wave are evident in other Canadian studies (mostly done prior to the BA.5 waves).<sup>20</sup> A national US  
173 study among blood donors reports lower levels of infection than do we,<sup>6</sup> but has not yet reported on  
174 the BA.4/5 waves. Moreover, blood donors or hospitalized patients may have notable biases.<sup>20</sup> Since  
175 the Omicron variant of SARS-CoV-2 appeared, self-testing using rapid antigen tests displaced PCR-  
176 testing in many countries, including Canada.<sup>21</sup> The use of spike levels has limitations, although we

177 found it correlated with cellular immunity. Earlier studies demonstrate that high levels of spike or RBD  
178 antibodies are predictive of neutralizing antibodies<sup>8</sup> and correlate with lower viral loads that reduce  
179 severe disease in the infected and transmission to others.<sup>22</sup>

180

181 Nonetheless, our study has some limitations. First, we deliberately focused on distributions of antibody  
182 levels which overlap in the comparison categories, but this has the benefit of showing the full range of  
183 spike antibody response in the various strata of the infected and vaccinated. We may be  
184 underestimating spike antibody levels due to assay saturation.<sup>13</sup> N-positivity may have underestimated  
185 actual infection because mild cases among vaccinated adults did not mount an antibody response or  
186 because people did not seroconvert during the sampling period. Conversely, some adults may have  
187 reverted to N-negative status. Finally, defining infection based on cumulative seropositivity and time-  
188 specific viral test positivity is crude and made more complicated by periodic viral or vaccination waves.  
189 Thus, we are limited in quantifying the hybrid immunity arising from various sequences of variant  
190 infections and vaccinations. For example, the apparent plateauing of spike level declines at nine  
191 months in figure 3 may reflect cohorts facing at least two distinct vaccination or viral waves.

192

193 Canadian COVID-19 death rates are lower compared to the United States and other similar countries,<sup>23</sup>  
194 and we speculate this may be from the sequence of low levels of infection pre-Omicron paired with  
195 high vaccination coverage of two doses, followed by a large Omicron wave. Comparative analyses  
196 across countries using objective measures of hybrid immunity are required. In Canada and other  
197 countries, home-based self-drawn dried blood spots are a widely practicable and relatively inexpensive  
198 monitoring strategy for SARS-CoV-2 population immunity. Despite their limitations, serial serosurveys  
199 at the population level are reasonably efficient, low-cost ways to monitor hybrid immunity and to  
200 study newer variants of SARS-CoV-2, and possibly even other infectious agents.

201

## 202 **Materials and Methods**

203 From May 2020, the Action to Beat Coronavirus (Ab-C) conducted six serial assessments of SARS-CoV-2  
204 symptoms and seropositivity, with five surveys covering about 4000-9000 adults (fig 1). We recruited  
205 adults using the Angus Reid Forum, a nationally representative online polling platform that  
206 approximately matches Canada's demographic profile.<sup>4</sup> Details of the sampling, antibody testing  
207 strategy, and analyses have been published earlier.<sup>4,5,11,12</sup> The supplementary methods and  
208 supplementary figure S1 report the recruitment, the dried blood spot (DBS) sample return rates, and  
209 the few exclusions from the six phases of the study.

210

211 The online survey assessed demographic characteristics, history of smoking, hypertension, obesity  
212 (self-reported height and weight), diabetes, and experience with SARS-CoV-2 infection symptoms and  
213 PCR or rapid antigen testing. At the end of the survey, respondents indicated their willingness to self-  
214 collect a blood sample by finger prick, and we sent consenters a DBS collection kit. DBS samples were  
215 returned to Unity Health laboratories in Toronto, with mail transit times ranging 3-6 days. Sinai Health  
216 in Toronto conducted highly sensitive and specific chemiluminescence-based enzyme-linked



217 immunosorbent assays targeting the spike protein, RBD, and N.<sup>13,14</sup> Various quality control steps  
218 focused on reducing false positives and false negatives, and adjusting the dilution to better detect  
219 antibody signals once vaccination became widespread (Section S1 provides details of the lab methods  
220 and analyses). We conducted cluster analyses of N-positivity to assign a probability of seropositivity to  
221 each sample using control samples and those with known past viral testing results (supplementary  
222 figure S2). In a subset of 39 adults in Toronto selected conveniently, we collected venous blood  
223 samples at home, and tested these centrally for cellular immunity using the Euroimmun Interferon  
224 Gamma Release Assay<sup>15</sup> to detect T-cell activity against the spike protein (supplementary methods).  
225  
226 Our primary outcomes were the relative levels of antibodies to the spike protein (hereafter “spike  
227 levels”), which are increased both by vaccination and infection (defined as N-positivity or self-reported  
228 PCR/rapid test positivity), as a proxy for hybrid immunity levels. Our secondary outcome was the  
229 combination of vaccination history and infection. We applied the age-specific cumulative incidence of  
230 SARS-CoV-2 to the Statistics Canada national population totals<sup>16</sup> to derive estimates of the number of  
231 adults infected in each major phase and compared cumulative incidence to confirmed COVID deaths by  
232 phase. Confirmed COVID deaths in Canada<sup>9</sup> are within 10% of analyses that apply excess all-cause  
233 mortality as an upper bound for COVID-19 mortality.<sup>17</sup>  
234

### 235 **Acknowledgements**

236 We thank the thousands of Canadians who participated in the Ab-C study. Euroimmun Medical  
237 Diagnostics (Sean McFadden) supported the T-cell testing platform at St. Joseph’s Health Centre/Unity  
238 Health.  
239

### 240 **Competing interests**

241 ASS has received consulting fees from Apeiron Biologics, Cellenkos, Diffusion Pharmaceuticals, and GlaxoSmithKline  
242 outside the submitted work. IIB has served as a consultant for BlueDot and the National Hockey League Players’  
243 Association outside the submitted work.  
244

### 245 **Funding**

246 Funding was provided by the COVID-19 Immunity Task Force, Canadian Institutes of Health Research, Pfizer Global  
247 Medical Grants, and St. Michael’s Hospital Foundation. PJ and ACG are funded by the Canada Research Chairs  
248 Program. The funders had no role in study design, data collection and interpretation, or the decision to submit the  
249 work for publication.  
250

### 251 **Author contributions**

252 PJ and AR conceived the study. SHF, LN, AB, and EM contributed to Ab-C recruitment and implementation. PEB, SHF,  
253 XT, NN, TL, and PJ contributed to statistical analyses. HCB, KC, GM, MDB, TT, FQ, A-CG, MDP, and JC contributed to  
254 laboratory methods. ASS and IIB contributed to data analysis and interpretation. PJ, PEB, and SHF wrote the first  
255 draft, and all authors contributed. PJ is the study guarantor. The corresponding author attests that all listed authors  
256 meet authorship criteria and that no others meeting the criteria have been omitted.  
257

### 258 **Ethics**

259 The Ab-C study was approved by the Unity Health Toronto Research Ethics Board (REB # 20-107 and 21-213). All  
260 participants provided informed consent to be included in the study.  
261

262  
263  
264  
265

**Data availability**

Ab-C data will be made available publicly through the COVID-19 Immunity Task Force Databank. Analytical code will be available on request in accordance with the Ab-C study's data governance plan.



266  
267  
268  
269  
270  
271  
272  
273  
274  
275  
276  
277  
278  
279  
280  
281  
282  
283  
284  
285  
286  
287  
288  
289  
290  
291  
292  
293  
294  
295  
296  
297  
298  
299  
300  
301  
302  
303  
304  
305  
306  
307  
308  
309  
310  
311  
312  
313  
314  
315  
316  
317  
318

## References

- 1 Bobrovitz N, Ware H, Ma X, et al. Protective effectiveness of previous SARS-CoV-2 infection and hybrid immunity against the omicron variant and severe disease: a systematic review and meta-regression. *Lancet Infect Dis* 2023;S1473-3099(22)00801-5.
- 2 COVID-19 Forecasting Team. Past SARS-CoV-2 infection protection against re-infection: a systematic review and meta-analysis. *Lancet* 2022;401:833-42.
- 3 Altarawneh HN, Chemaitelly H, Hasan MR, et al. Protection against the Omicron variant from previous SARS-CoV-2 infection. *N Engl J Med* 2022;386:1288-90.
- 4 Tang X, Sharma A, Pasic M, et al. Assessment of SARS-CoV-2 seropositivity during the first and second viral waves in 2020 and 2021 among Canadian adults. *JAMA Netw Open* 2022;5:e2146798.
- 5 Brown PE, Fu SH, Bansal A, et al. Omicron BA.1/1.1 SARS-CoV-2 infection among vaccinated Canadian adults. *N Engl J Med* 2022;386:2337-9.
- 6 Centers for Disease Control and Prevention. COVID Data Tracker. Atlanta, GA: US Department of Health and Human Services, CDC, 2023. <https://covid.cdc.gov/covid-data-tracker> (accessed 28 February 2023).
- 7 Goldberg Y, Mandel M, Bar-On YM, et al. Protection and waning of natural and hybrid immunity to SARS-CoV-2. *N Engl J Med* 2022;386:2201-12.
- 8 Feng C, Shi J, Fan Q, et al. Protective humoral and cellular immune responses to SARS-CoV-2 persist up to 1 year after recovery. *Nat Commun* 2021;12:4984.
- 9 Public Health Agency of Canada. Coronavirus disease (COVID-19). Ottawa, ON: Public Health Agency of Canada, 2023. <https://health-infobase.canada.ca/covid-19/> (accessed 28 February 2023).
- 10 Duarte N, Yanes-Lane M, Arora RK, et al. Adapting serosurveys for the SARS-CoV-2 vaccine era. *Open Forum Infect Dis* 2022;9:ofab632.
- 11 Wu DC, Jha P, Lam T, et al. Predictors of self-reported symptoms and testing for COVID-19 in Canada using a nationally representative survey. *PLoS One* 2020;15:e0240778.
- 12 Tang X, Gelband H, Nagelkerke N, et al. COVID-19 vaccination intention during early vaccine rollout in Canada: a nationwide online survey. *Lancet Reg Health Am* 2021;2:100055.
- 13 Colwill K, Galipeau Y, Stuibler M, et al. A scalable serology solution for profiling humoral immune responses to SARS-CoV-2 infection and vaccination. *Clin Transl Immunology* 2022;11:e1380.
- 14 Isho B, Abe KT, Zuo M, et al. Persistence of serum and saliva antibody responses to SARS-CoV-2 spike antigens in COVID-19 patients. *Sci Immunol* 2020;5:eabe5511.
- 15 Fernandez-Gonzalez M, Agullo V, Padilla S, et al. Clinical performance of a standardized Severe Acute Respiratory Syndrome Coronavirus 2 (SARS-CoV-2) interferon-gamma release assay for simple detection of T-cell responses after infection or vaccination. *Clin Infect Dis* 2022;75:e338-46.
- 16 Statistics Canada. Table 17-10-0005-01 population estimates on July 1st, by age and sex. 2023. <https://doi.org/10.25318/1710000501-eng> (accessed 15 February 2023).
- 17 World Health Organization. Global excess deaths associated with COVID-19 (modelled estimates). Geneva: World Health Organization, 2022. <https://www.who.int/data/sets/global-excess-deaths-associated-with-covid-19-modelled-estimates> (accessed 28 February 2023).
- 18 Strasser ZH, Greifer N, Hadavand A, Murphy SN, Estiri H. Estimates of SARS-CoV-2 Omicron BA.2 subvariant severity in New England. *JAMA Netw Open* 2022;5:e2238354.
- 19 Tan CY, Chiew CJ, Lee VJ, Ong B, Lye DC, Tan KB. Comparative effectiveness of 3 or 4 doses of mRNA and inactivated whole-virus vaccines against COVID-19 infection, hospitalization and severe outcomes among elderly in Singapore. *Lancet Reg Health West Pac* 2022;29:100654.
- 20 Murphy TJ, Swail H, Jain J, et al. The evolution of population immunity to SARS-CoV-2 – a time-series study of seroprevalence in Canada, 2020-2022. *Can Med Assoc J* (in press).
- 21 Angus Reid Forum. Incidence of Omicron: One-in-five Canadians report COVID-19 infection in their household since Dec. 1. Angus Reid Forum, 2022. <https://angusreid.org/omicron-incidence-restrictions/> (accessed 28 February 2023).
- 22 Tan ST, Kwan AT, Rodriguez-Barraquer I, et al. Infectiousness of SARS-CoV-2 breakthrough infections and reinfections during the Omicron wave. *Nat Med* 2023;29(2):358-65.
- 23 Razak F, Shin S, Naylor CD, Slutsky AS. Canada's response to the initial 2 years of the COVID-19 pandemic: a comparison with peer countries. *Can Med Assoc J* 2022;194:E870-7.
- 24 Little N. COVID-19 Tracker Canada. <https://covid19tracker.ca/> (accessed 3 February 2023).
- 25 Fox J, Weisberg S. An R companion to applied regression. Thousand Oaks, CA: Sage Publications; 2018.

**Table 1. Cumulative incidence, numbers of infected adults, cumulative deaths, and period COVID-19 mortality rate in Canada during various SARS-CoV-2 viral waves**

| <b>Time period</b>                 | <b>Cumulative incidence*<br/>% (95% CI)</b> | <b>No of adult (age 18 or<br/>older) infections in<br/>millions</b> | <b>Cumulative<br/>no of deaths<sup>†</sup></b> | <b>Covid-19 mortality rate per<br/>million per week during the<br/>relevant period</b> |
|------------------------------------|---------------------------------------------|---------------------------------------------------------------------|------------------------------------------------|----------------------------------------------------------------------------------------|
| Pre-Omicron<br>2020-2021           | 12.7 (11.2-14.1)                            | 3.9 (3.5-4.4)                                                       | 30 149                                         | 8.6                                                                                    |
| Omicron BA.1/1.1<br>Jan.-Mar. 2022 | 35.7 (34.0-37.4)                            | 11.3 (10.7-11.8)                                                    | 37 750                                         | 16.6                                                                                   |
| Omicron BA.2/5<br>Apr.-Dec. 2022   | 77.7 (75.7-79.6)                            | 24.6 (23.9-25.2)                                                    | 49 674                                         | 7.7                                                                                    |

Notes:

\*Post-stratified for geographic region, age, sex, and vaccination status to derive the mean estimate (supplementary methods).

†We used data by end of December 2021, March 2022, and December 2022 from Public Health Agency of Canada's COVID-19 epidemiology update (<https://health-infobase.canada.ca/covid-19/>) for total number of deaths.<sup>9</sup> Applying the proportion of long-term care deaths from Long-term Care COVID-19 Tracker (<https://ltc-covid19-tracker.ca>) to the last period, 19 789 of total cumulative deaths occurred in long-term care. Of all long-term care deaths, about 80% occurred during the pre-Omicron period, mostly during the first viral wave of March-June 2020 (fig 1). Over 90% of all COVID deaths occurred at ages 60 or older.

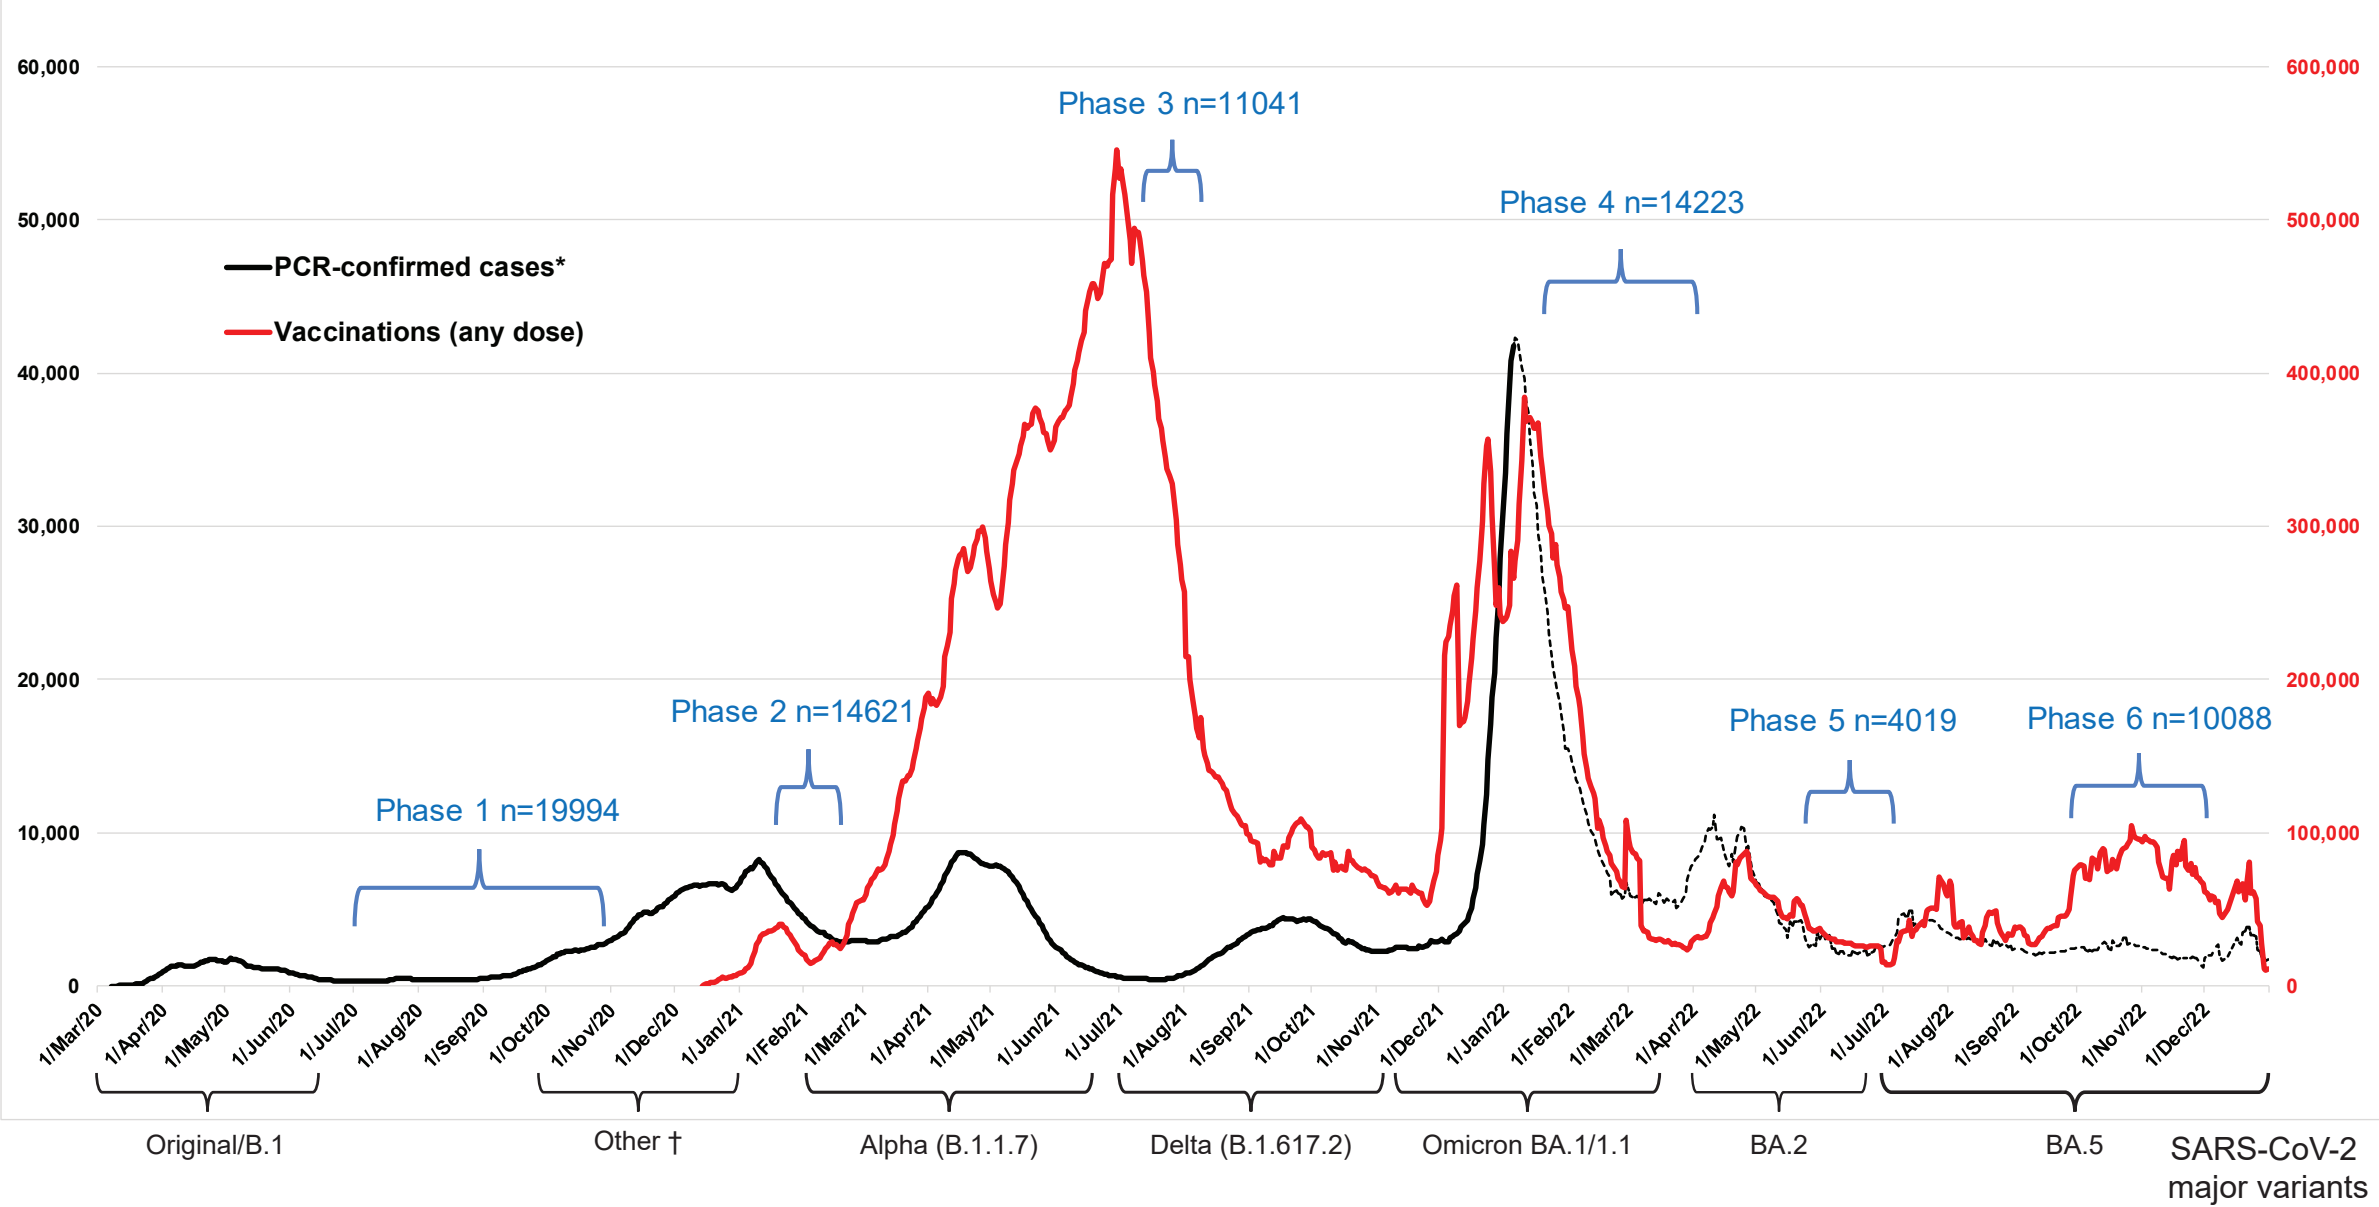

\* Dotted line indicates period after restrictions to PCR testing eligibility  
 † Major variants include AE.8, B.1.36.36, B.1.2, B.1.160, B.1.438.1

**Figure 1. Seven-day rolling averages of PCR-confirmed covid-19 cases in Canada (black solid and dotted line), and SARS-CoV-2 vaccinations (any dose; red line) in relation to the data collection phases of the Ab-C study.** Testing and vaccination data were derived from COVID-19 Tracker Canada as of 3 February 2023 (<https://COVID19Tracker.ca>).<sup>24</sup> Data on major variants were obtained from Public Health Agency of Canada’s Health Infobase COVID-19 epidemiology update (<https://health-infobase.canada.ca/covid-19/testing-variants.html>).<sup>9</sup> Dotted lines for PCR-based testing after 1 January 2022 reflect the major uncertainty in PCR-based testing. Widespread PCR testing guidelines became stricter and were significantly scaled back in community settings and thus became far less reliable to monitor trends.

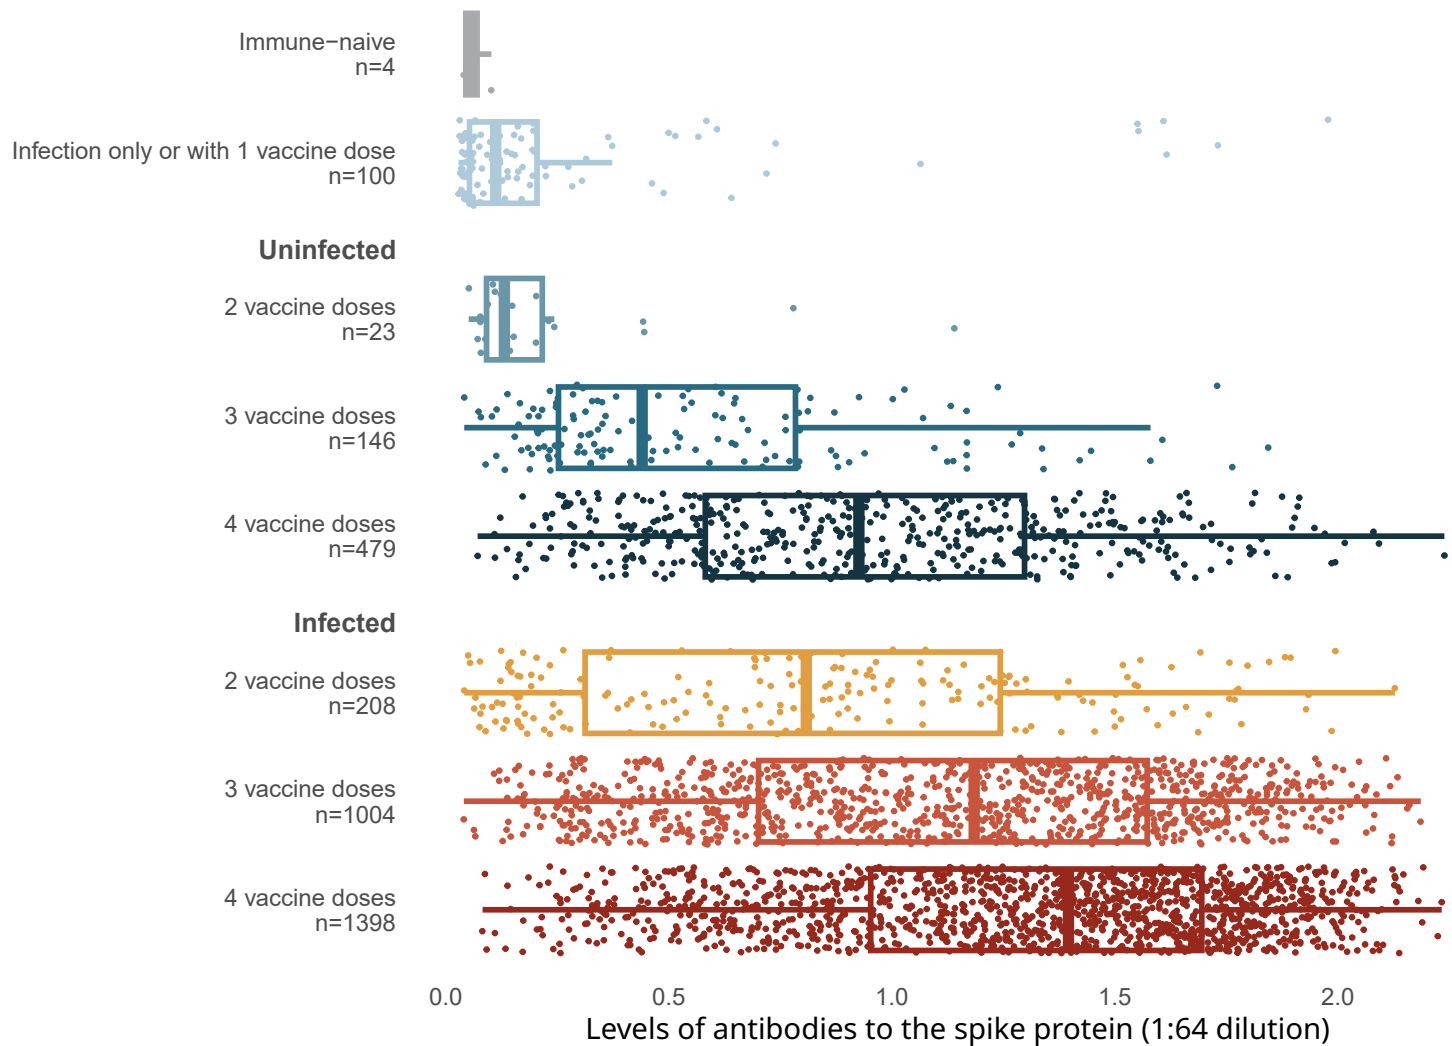

**Figure 2. Levels of antibodies to the spike protein stratified by infection and number of vaccination doses.**

Circles represent individuals with their last vaccination (or unvaccinated) >10 days prior to dried blood spot sample collection (n=3378 with complete information available as of the time of analyses after excluding 14 low quality samples). We further excluded 16 participants whose samples were seronegative and viral test was positive, but who did not provide viral test dates or reported test dates less than eight days from the receipt of DBS. The solid-coloured line represents the median and box plots show the interquartile range. The results above a relative level of 1.2 are outside the linear range of the assay. Results using the receptor-binding domain antigen were similar to the spike protein (supplementary figure S3).

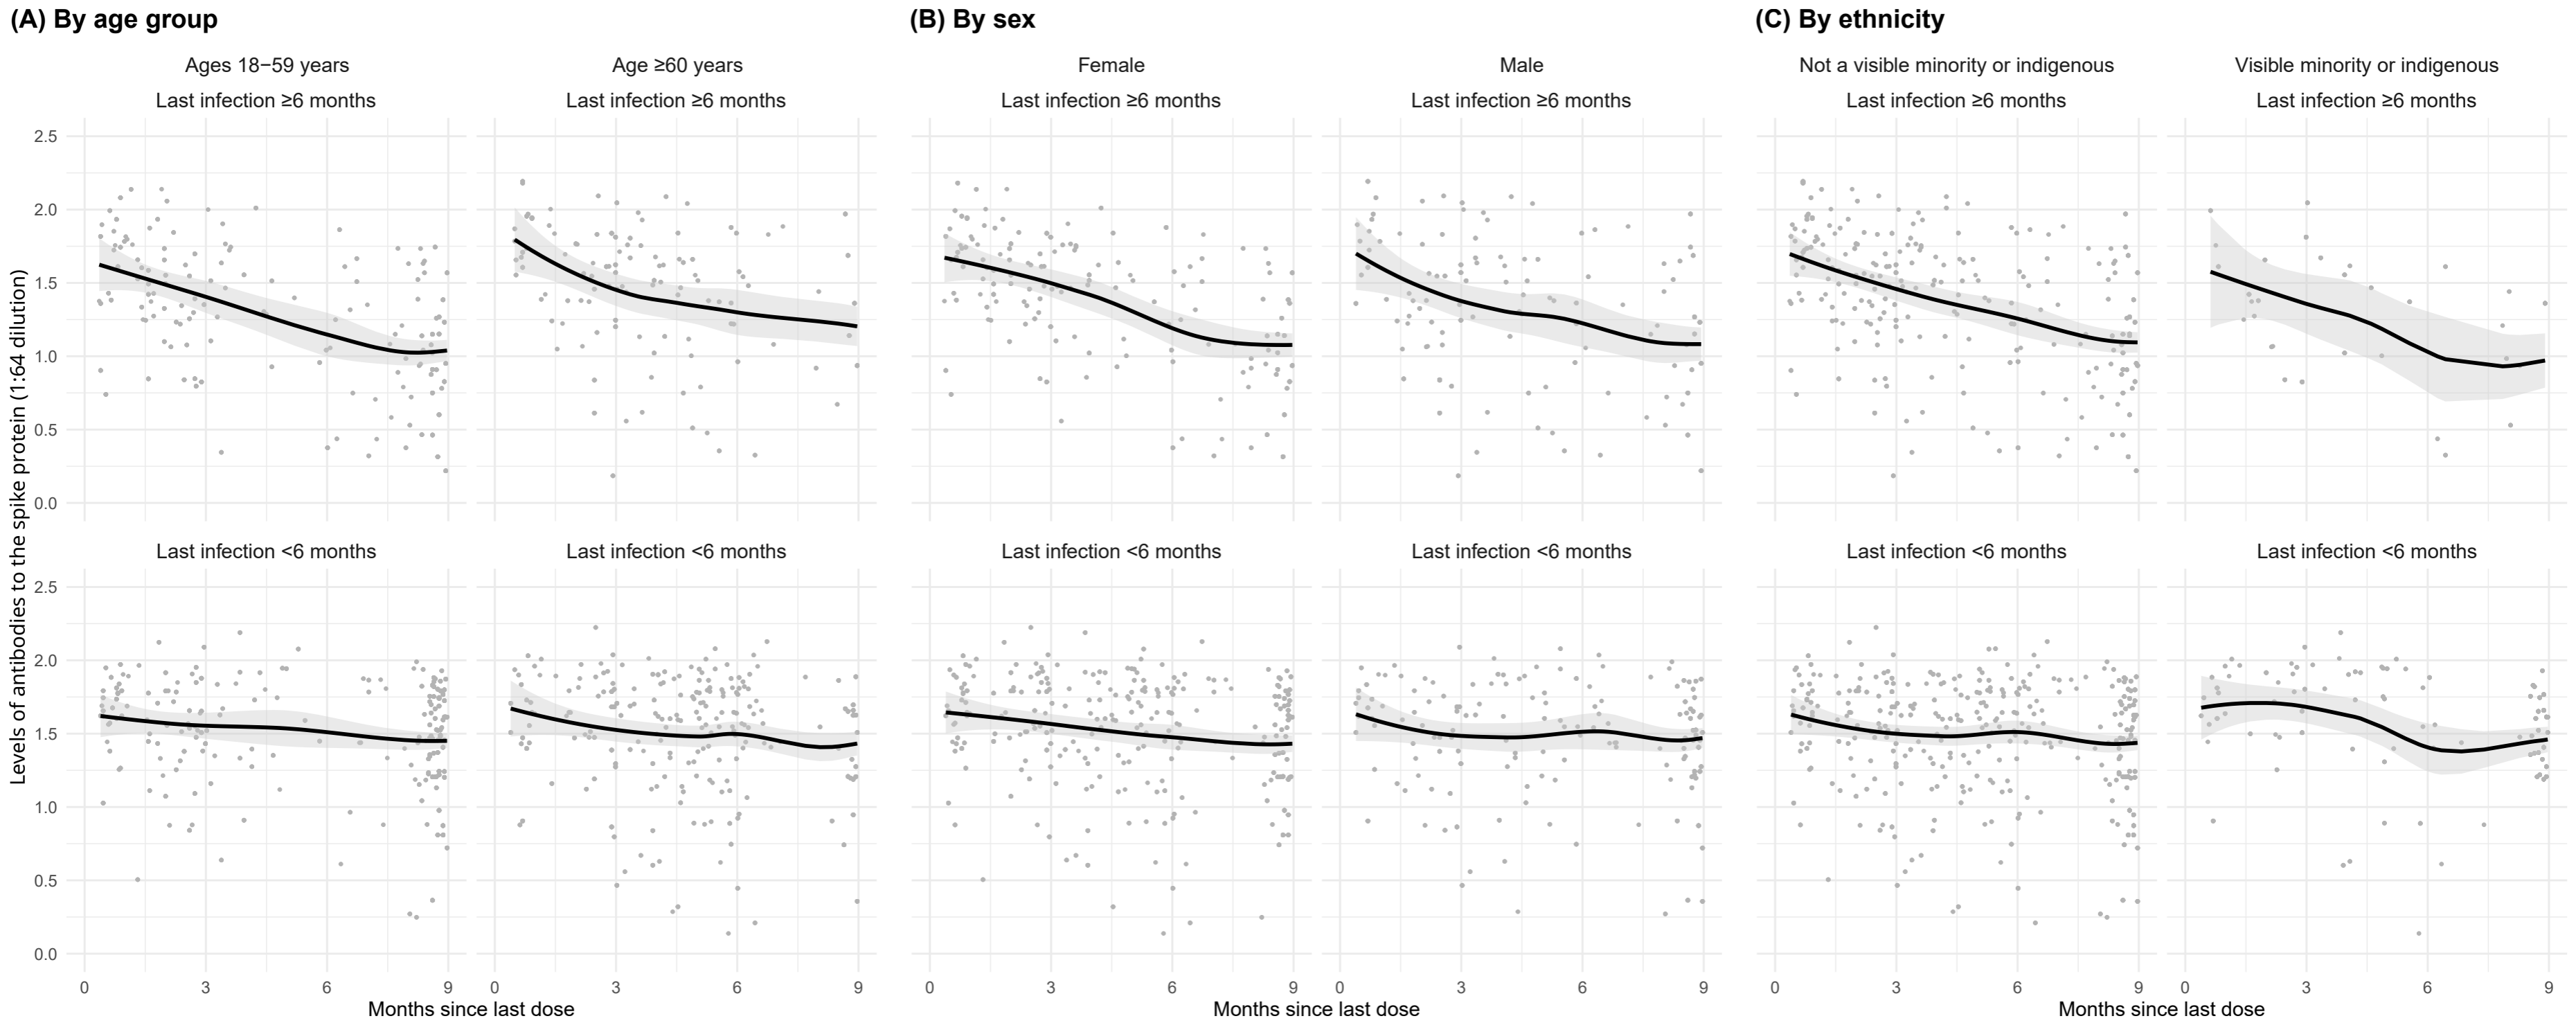

**Figure 3. Age, sex, and ethnicity-specific trends to nine months in levels of antibodies to the spike protein among adults vaccinated with 3-4 doses, stratified by infection more than six months ago or less than six months ago.**

See footnote to figure 2 for testing details. We created smoothed curves and 95% confidence intervals using locally weighted scatterplot smoothing with span parameter of 0.8.<sup>25</sup>

Ages 18–59 years

Age 60 years and above

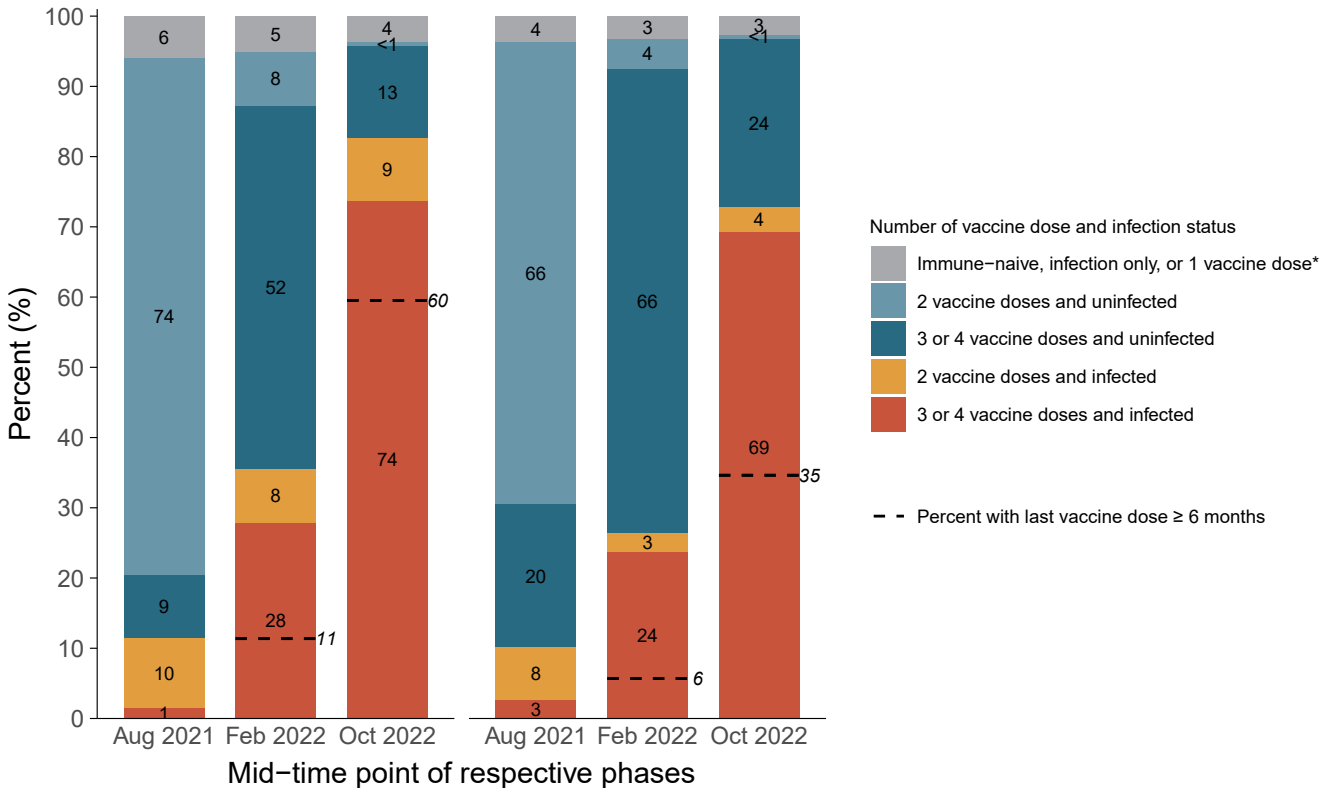

**Figure 4. Cumulative incidence in each stratum of infection and vaccination in the pre-omicron wave, during the omicron BA.1/1.1 wave, and during the BA.2 and BA.5 waves by age group.**

\*Including uninfected and infected cases. The first column in each age group represents the antibody and viral test positivity for the entire period prior to omicron, whereas the second column represents the values during the omicron BA.1/1.1 wave and the third during the BA.2/5 waves. By the last time period studied, the numbers of participants aged 15–59 who were N-positive, viral test-positive, and positive to both were 675 (41%), 37 (2%), and 699 (43%). The comparable numbers for participants aged 60 or more were 763 (44%), 35 (2%), and 500 (29%).

## **Supplementary material**

Brown PE, Fu SH, Newcombe L, et al. Hybrid immunity from SARS-CoV-2 infection and vaccination in Canadian adults: cohort study.



|                                                                                                                                                          |    |
|----------------------------------------------------------------------------------------------------------------------------------------------------------|----|
| <b>Methods</b>                                                                                                                                           |    |
| Subject recruitment                                                                                                                                      | 1  |
| IgG serology                                                                                                                                             | 1  |
| Determining positivity                                                                                                                                   | 2  |
| IGRA T-cell analysis                                                                                                                                     | 2  |
| Epidemiological analyses                                                                                                                                 | 3  |
| <b>Supplementary figures</b>                                                                                                                             |    |
| Figure S1. Study flow including sampling and study inclusion by phase in the Ab-C study                                                                  | 4  |
| Figure S2. Histograms and fitted densities for N positivity levels                                                                                       | 5  |
| Figure S3. Levels of antibodies to RBD stratified by infection and number of vaccination doses                                                           | 6  |
| Figure S4. Levels of antibodies to the spike protein stratified by infection, vaccination doses, and time since last vaccination or since last infection | 7  |
| Figure S5. Correlation between levels of antibodies to the spike protein and T-cell spike titers                                                         | 8  |
| <b>Supplementary tables</b>                                                                                                                              |    |
| Table S1. Sample characteristics and representativeness of phases 4 and 6 for online surveys and DBS samples                                             | 9  |
| <b>STROBE Statement</b>                                                                                                                                  | 10 |
| <b>Acknowledgments</b>                                                                                                                                   | 13 |
| <b>Supplementary references</b>                                                                                                                          | 13 |

## Methods

### Subject recruitment

The Action to Beat Coronavirus (Ab-C) study received ethical approval from Unity Health Toronto (REB 20-107). In Phase 1, from May through September 2020, we invited 44 270 members (out of about 78 000 total members) of the Angus Reid Forum,<sup>1</sup> an established nationwide polling panel of Canadian adults aged 18 and older, to complete an online survey about SARS-CoV-2 symptoms and testing histories. The sampled population was stratified by age groups (18-34, 35-54, 55+); sex (male, female); education (high school education or lower, some college or college or technical degree, some university, or university degree); and region, by census metropolitan area to match the national demographic profile, with oversampling of adults 60 years or older. In August 2021, we invited about 3100 additional Forum panel members from 17 regions with high burden of infection (of 93 total regions nationwide), based on a regression analysis of SARS-CoV-2 case counts.<sup>2</sup> From December 2020 through January 2021, we invited all 19 994 Phase 1 participants to join Phase 2, retaining the same sampling frame. Phase 3 and 4 recruitment used similar approaches. In Phase 4, we conducted additional outreach to 2587 additional members from marginalized groups at higher risk of SARS-CoV-2 infection (2045 visible minorities and 542 Indigenous individuals). Of these, 1229 agreed to provide DBS and were included in Phase 4 mailouts (919 visible minorities and 310 Indigenous individuals). In Phase 5, a subset of 1304 participants who had recently tested negative for antibodies to nucleocapsid (N) were selected for a supplementary DBS sample; in Phase 6, 5703 DBS participants from any previous phase were enrolled.

Participants were not compensated financially by the study for participating, but earned modest redeemable points from the Angus Reid Forum.<sup>3</sup> Figure S1 illustrates the study recruitment and flow; there were few (about 1%) exclusions, mostly from incomplete testing.

### IgG serology

Participants collected five small circles of blood on special bar-coded filter paper, dried the sample for at least two hours, placed it in a two-layer protective pouch, and returned it to St. Michael's Hospital in Toronto, postage prepaid. Mailing time across Canada ranged from about 3 to 8 days. Upon arrival, samples were scanned, catalogued, and stored at 4°C in larger boxes with additional desiccant, and monitored for humidity levels (kept <20%).

Antibodies were then eluted from a 4.7 mm punch in 99 µL of PBS + 0.1% Tween (PBS-T) and 1% Triton X-100. The use of 99 µL was to ensure sufficient eluate to test three antigens (spike protein, receptor binding domain (RBD) of the spike, and nucleocapsid protein (N)). Punches were incubated in elution buffer for a minimum of 4 hours with gentle shaking (150 RPM) at room temperature or overnight at 4°C. The samples were then centrifuged at 1000 g for 30 seconds.

The Network Biology Collaborative Centre at Sinai Health, Toronto, conducted a high-throughput, highly sensitive chemiluminescence-based ELISA targeting the spike protein, RBD, and N. Chemiluminescent ELISA assays were performed as previously described on a ThermoFisher Scientific F7 robotic platform<sup>4,5</sup> with a few modifications. Briefly, LUMITRAC 600 high-binding white polystyrene 384-well microplates (Greiner Bio-One #781074, VWR #82051-268) were pre-coated overnight with 10 µL/well of antigen (50 ng spike (SmT1), 20 ng RBD and 7 ng nucleocapsid, all supplied by the National Research Council of Canada (NRC)). After washing (all washes were 4 times with 100 µL PBS-T), wells were blocked for 1 hour in 80 µL 5% Blocker BLOTTO (ThermoFisher Scientific, #37530) and then washed. 10 µL of sample (2.5 or 0.156 µL of DBS eluate diluted in 1% final Blocker BLOTTO in PBS-T) was added to each well and incubated for 2 hours at room temperature. After washing, 10 µL of a human anti-IgG fused to HRP (IgG#5, supplied by NRC, final of 0.9 ng/well) diluted in 1% final Blocker BLOTTO in PBS-T was added to each well followed by a 1-hour incubation at room temperature. After 4 washes, 10 µL of SuperSignal ELISA pico chemiluminescent substrate (diluted 1:4 in MilliQ distilled H<sub>2</sub>O) was added to each well and incubated for 5-8 min at room temperature. Chemiluminescence was read on an EnVision (Perkin Elmer) plate reader at 100 ms/well using an ultra-sensitive detector.

Each 384-well assay plate included replicates of a standard reference curve of a human anti-spike IgG antibody (VHH72-Fc supplied by NRC)<sup>5</sup> or an anti-nucleocapsid IgG antibody (Genscript, #A02039), positive and negative master mixes of pooled serum samples, human IgG negative control (Sigma, #I4506), and blanks as controls. Negative and/or positive DBS controls (defined using plasma serology results) were included in runs in each phase.

For each antigen, raw values (counts per second) were normalized to a blank-subtracted point in the linear range of the standard reference curve to create a relative ratio (hereinafter referred to as antibody levels). The samples were processed at a 1:4 dilution of the DBS eluate (2.5 µL/well of sample) and 1:64 dilution. We used the former to derive positivity threshold and the latter to display antibody level distributions.

## Determining positivity

There is uncertainty in the measured values of the antibodies to N. We sought to reflect this uncertainty in the confidence intervals for prevalence estimates. We used control samples and known positives to estimate the probability of seropositivity for each sample, and we used multiple imputation to account for the unknown true seropositivity status. We estimated log relative rates in a model adjusting for age, sex, region, and vaccination status. Using post-stratification, we computed estimates and confidence intervals for prevalence in the population and various subgroups, adjusting for the representativeness of the sample.

Figure S2A shows the histogram of logged N-positivity for known laboratory negative control samples within each testing plate (in blue) and antibody levels from known positive samples from phase 4. Known positives are individuals who reported a positive covid-19 test result more than seven days before their DBS was received. We used maximum likelihood estimation to define skew-normal densities for the case and control samples, shown as solid lines. Figures S2B to S2D show histograms of observed antibody levels for each phase, along with a fitted density estimated as a mixture of the red and blue densities from Figure S2A. We estimated a mixing proportion for each phase (by maximum likelihood), the densities for each component are shown in blue and red for the seronegative and seropositive components respectively.

For each sample, we calculated a probability of seropositivity using Bayes rule. This probability depends on the mixing proportion as well as the red and blue densities, as when prevalence is high the threshold should be lowered to reduce false negatives. These probabilities are used for multiple imputation, generating 100 datasets where each sample is designated as seropositive or seronegative. For grouping subjects as infected and uninfected in the “immunity wall” figures, cutoffs for each phase (shown in Figure S2s) are set so that the expected number of false positives and false negatives is identical.

Prevalence estimates and their confidence intervals use post-stratification, adjusting the study sample to reflect the Canadian distribution of population by age, sex, region and vaccination status. For each phase, we fit a logistic regression model which included vaccination status (no doses v. one or more) and region (British Columbia and Yukon; Prairie provinces, NWT, Nunavut; Ontario; Quebec; Atlantic provinces), each of which are interacted with age and sex (and the age-sex interaction). We did not interact vaccination status with region, as the number of unvaccinated individuals in the sample was small in some regions. We obtained estimates of log relative rates and the accompanying variance matrix for each of the 100 imputed datasets and combined them according to Rubin’s rule.

The population by age, sex, province, and vaccination status at each phase are obtained from the Public Health Agency of Canada’s Infobase.<sup>6</sup> Weights are calculated for each age-sex-region-vaccination group and a weighted average of group-level prevalences is computed with standard errors obtained from the delta method.<sup>7</sup>

## Interferon-Gamma Release Assay (IGRA) T-cell analysis

We selected a convenience sample of adults in the Ab-C study within urban Toronto. After obtaining consent for re-contact, participants attended either a Unity Health Toronto hospital visit or agreed to a home visit. A phlebotomist collected one tube of venous blood from each participant using 7 mL lithium-heparin blood collection tubes. Blood collection tubes were mixed by inversion, stored at room temperature, and delivered to the St. Joseph’s Health Centre laboratory within 16 hours of collection to be refrigerated at 2-8°C.

Prior to stimulation, samples were removed from refrigeration for 30 minutes. For each whole-blood sample, one stimulation tube set from the Quan-T-Cell SARS-CoV-2 kit (EUROIMMUN, ET 2606-3003) was warmed to room temperature. Each set consisted of three stimulation tubes: (1) CoV-2 IGRA BLANK: no T-cell stimulation, for determination of the individual IFN- $\gamma$  background; (2) CoV-2 IGRA TUBE: specific T-cell stimulation using antigens based on the SARS-CoV-2 spike protein; (3) CoV-2 IGRA STIM: unspecific T-cell stimulation by means of a mitogen, for control of the stimulation ability. The blood collection tube was mixed by gentle inversion, then sampled using 1 mL pipets to draw and transfer 500  $\mu$ L of whole blood to each of the three tubes. The filled stimulation tubes were sealed and mixed by rapid inversion, then shaken by hand and incubated at 37°C for 20-24 hours. At the end of the incubation period, the tubes were removed from the incubator and centrifuged for 10 minutes between 6000-12000 x g.

Following centrifugation, the plasma obtained from the stimulated whole-blood samples was diluted and used on the anti-IFN- $\gamma$ -coated ELISA plate. EUROIMMUN Mississauga conducted interferon-gamma release assays using the Quan-T-Cell ELISA (EQ 6841-9601). 100  $\mu$ L of the calibrators, controls, and diluted plasma samples (1:5 in sample buffer) were transferred into the individual microplate wells and incubated for 120 minutes at room temperature. The wells were washed (5 times, each using 300  $\mu$ L of wash buffer). 100  $\mu$ L of biotin was pipetted into each well and incubated for 30 minutes at room temperature. The wells were washed, and 100  $\mu$ L of enzyme conjugate was pipetted into each well and incubated for 30

minutes at room temperature. The wells were washed, and 100  $\mu$ L of chromogen/substrate solution was pipetted into each well and incubated for 20 minutes at room temperature, protected from direct sunlight. 100  $\mu$ L of stop solution was pipetted into each well. Photometric measurements of the colour intensity were made at a wavelength of 450 nm and a reference wavelength between 620 and 650 nm.

## Epidemiological Analyses

This analysis focused on Phases 3 to 6 of the Ab-C study, which correspond to the pre-omicron (Aug 15 to Oct 15, 2021) and omicron (BA.1/1.1, BA.2, and BA.5) periods (Jan 24 to Mar 30; May 27 to Jul 1; and Sep 26 to Nov 21, 2022), respectively. To confirm the Ab-C data is representative of the Canadian population, we calculated the proportion of participants who filled out the survey and provided DBS by demographic characteristics (province, household size, age, sex, education, ethnicity, weight, smoking status, diabetes, hypertension) and vaccination status, and compared these to the Canadian national data (Table S1).

As already reported,<sup>2</sup> the demographic and health characteristics of those who completed surveys and provided DBS were generally comparable to the Canadian census population, except for fewer adults with an educational level of some college or less in the Ab-C study compared with the census population. In Phase 6, the proportion of adults unvaccinated was similar in the Ab-C surveyed population (8%) as in Canada overall (10%). However, the unvaccinated rates were lower in those who submitted DBS samples (3%). We have previously found greater unvaccinated rates among the lower levels of education.<sup>8</sup> Education level (some college or less, college graduate, university graduate) was inversely correlated with vaccination status: chi-squared statistic 17.156 (df=2; p-value of 0.0001882). Hence, we adjusted for vaccination status when calculating estimates of cumulative incidence. Moreover, the Ab-C study has had fewer racial or ethnic minority adults (which is defined by Statistics Canada, the national lead statistical agency, as “Visible Minorities”) but more Indigenous adults than the census population. Compared with the census population or nationally representative surveys, study participants had a similar prevalence of obesity, current or former smoking, diabetes and hypertension.

The phase 3 to 6 population distributions, which are most directly relevant to estimating cumulative and period-specific Omicron incidence, are broadly similar among those who completed surveys and those who provided a DBS (Table S1).<sup>9</sup> Finally, a comparison of those invited who participated and did not in Phase 1 of the study showed a bias towards greater female participation.<sup>2</sup> However, differences by sex were not important predictors of cumulative incidence (data not shown), so this bias does not materially affect the overall estimates of cumulative infection.

The age-specific “immunity wall” in Figure 4 defines infection as either having tested positive on polymerase chain reaction or antigen rapid test or with antibodies to the N antigen (which is appropriate among the largely vaccinated cohort). N positivity reflects infection and would not arise from Canadian-approved vaccines that only contain the spike protein. We defined infection as any positive covid-19 test more than 7 days prior to the DBS being received and any N positivity.

We obtained the overall cumulative incidence of SARS-CoV-2 infections based on N positivity and derived the 95% confidence intervals using the delta method.<sup>7</sup> In order to examine the level of antibody response from infection and vaccination (by vaccine doses), we display the distributions of antibodies to spike antigens (at the 1:64 dilution) using box plots with jitter (Figure 2). Results for antibodies to RBD are similar (Figure S4). All analyses were performed using Stata 17 and R 4.2.1.

**Figure S1. Study flow including sampling and study inclusion by phase in the Ab-C study**

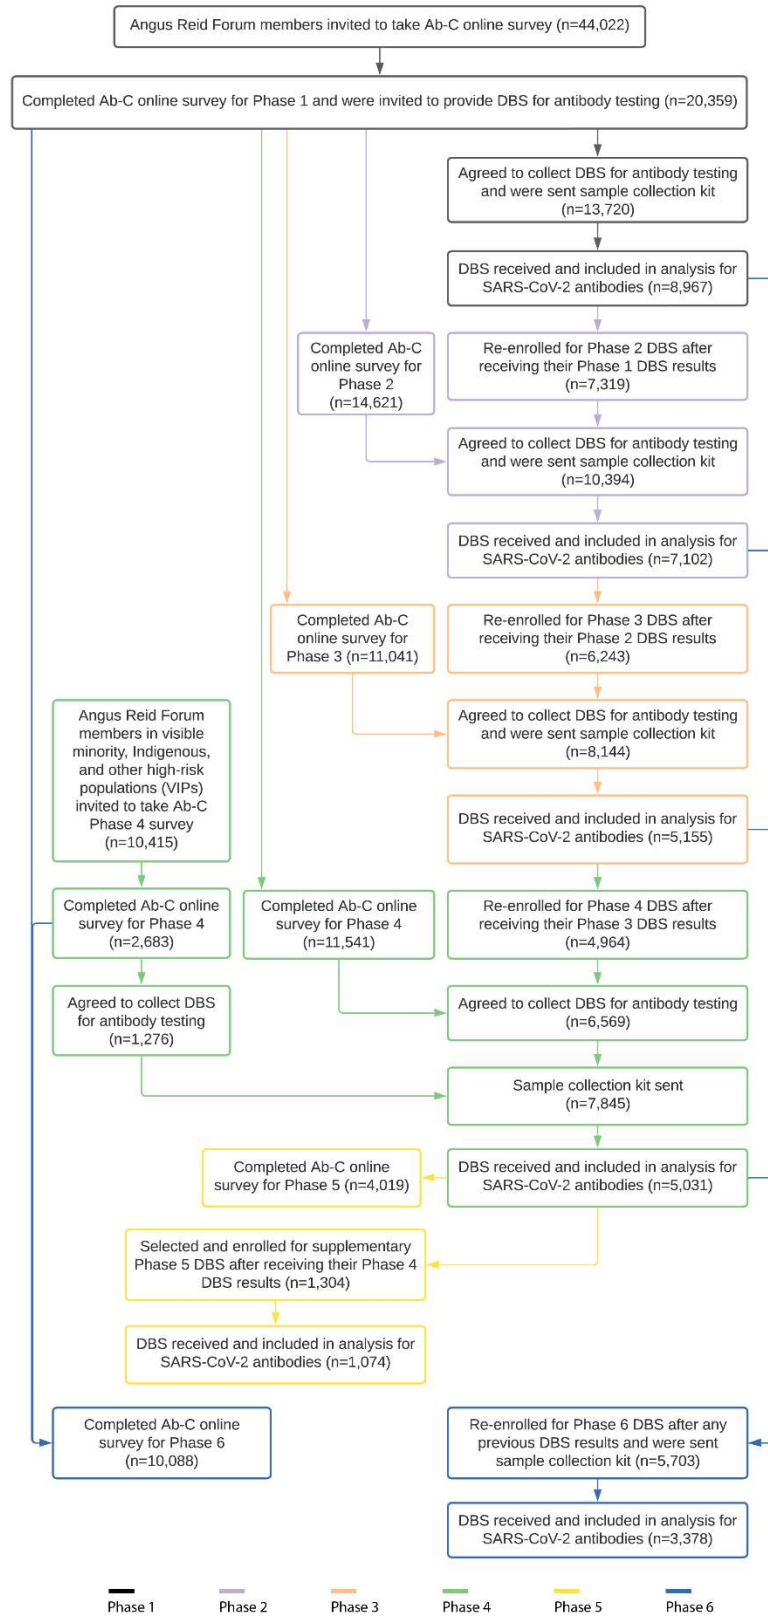

**Figure S2. Histograms and fitted densities for N positivity levels. Values on the natural scale (not logged) are shown on the horizontal axis in grey.**

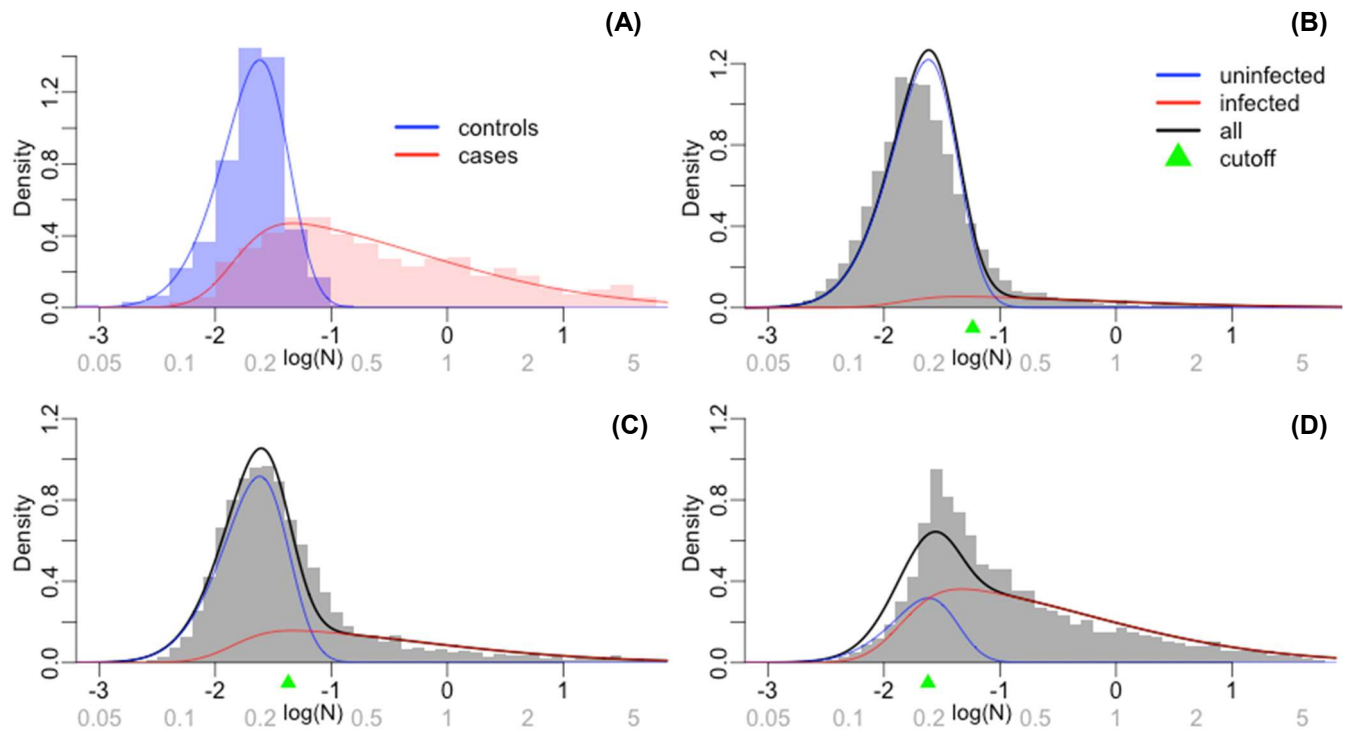



**Figure S3. Levels of antibodies to RBD stratified by infection and number of vaccination doses.**

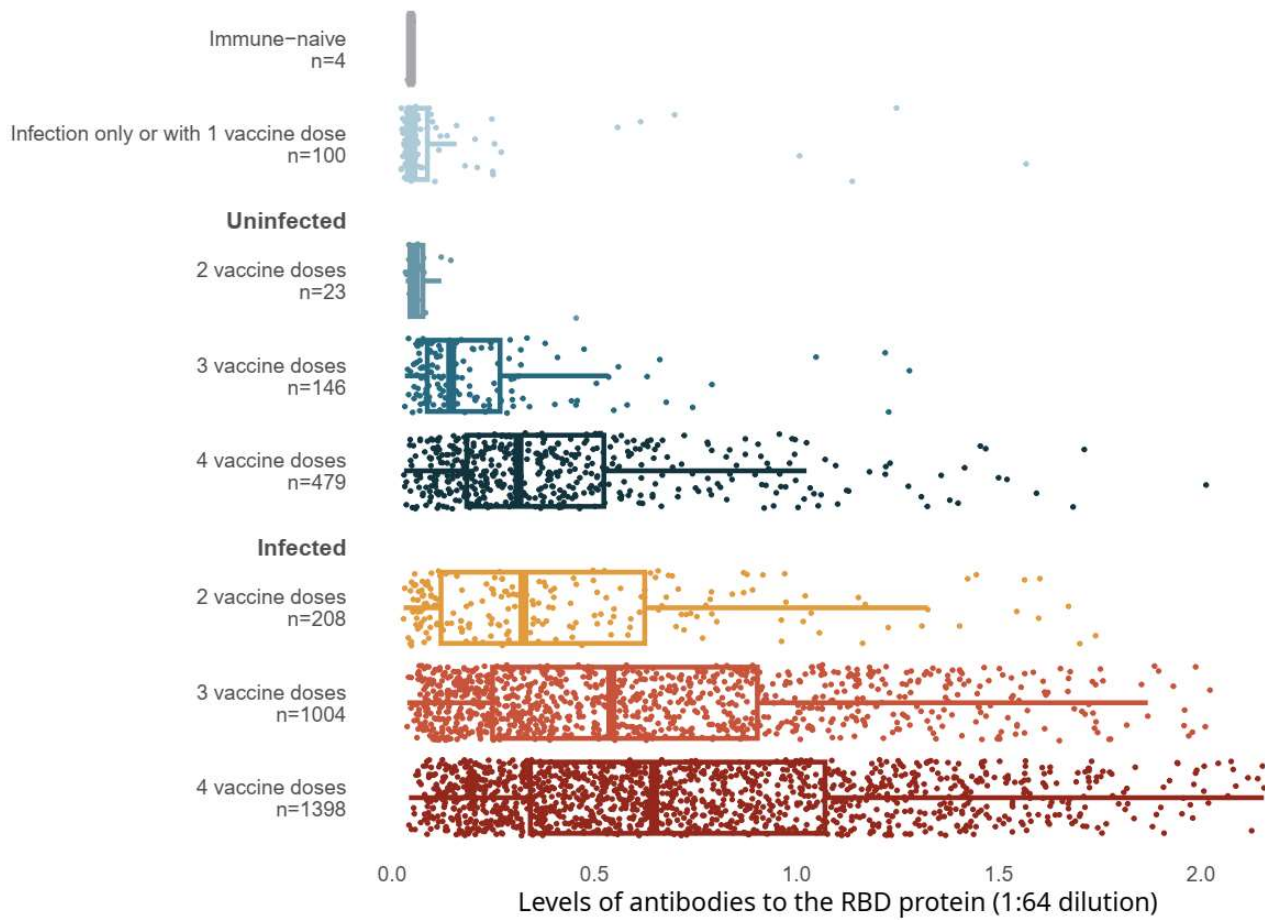



**Figure S4. Levels of antibodies to the spike protein stratified by infection, vaccination doses, and time since last vaccination or since last infection.**

(A) Uninfected by time of last dose

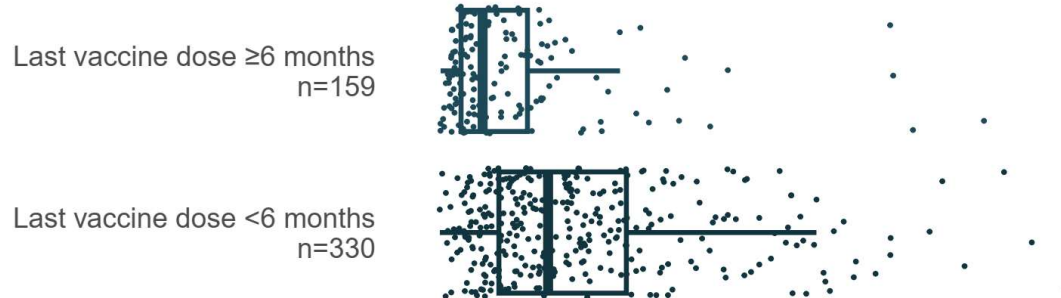

(B) Infected by time of last dose and infection

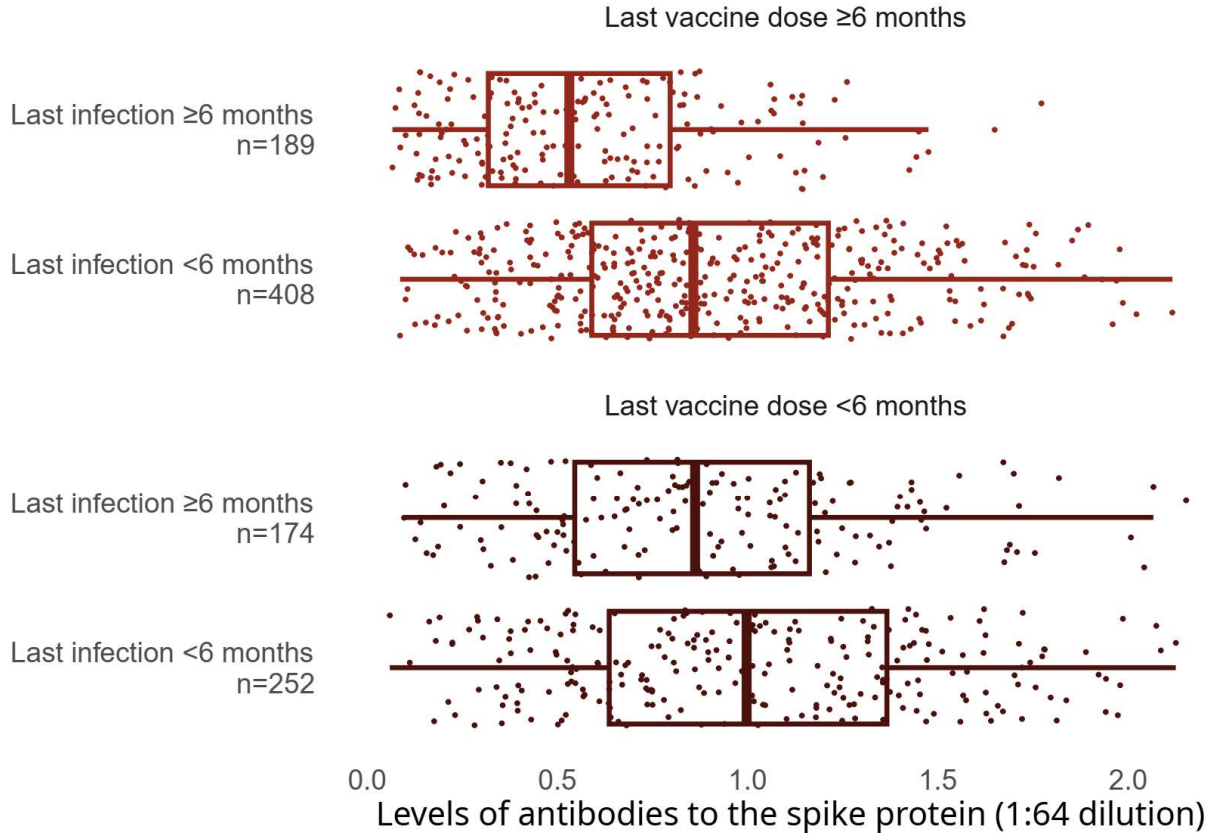

Figure S5. Correlation between levels of antibodies to the spike protein and T-cell spike titers.

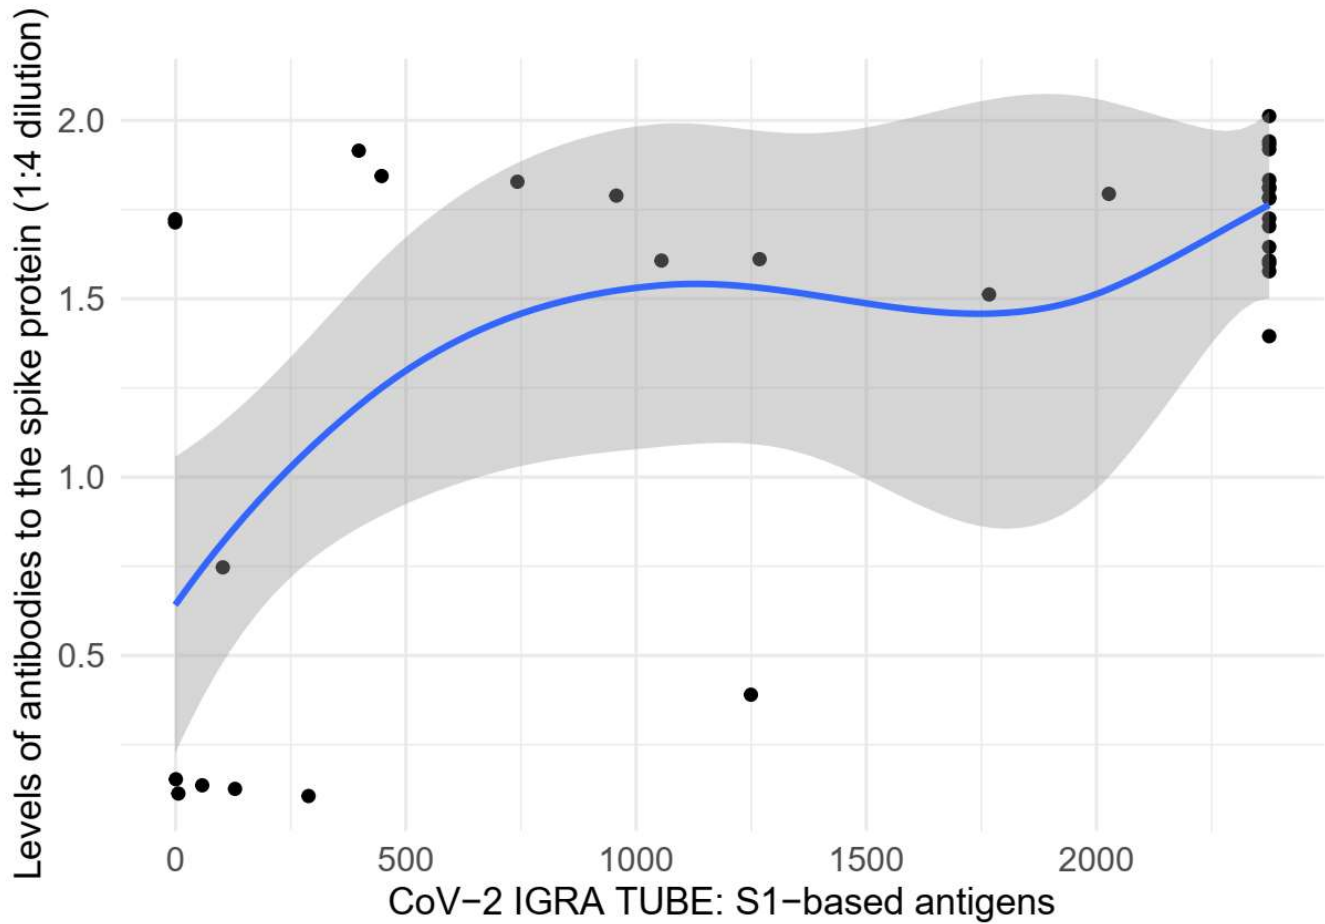

Notes: X-axis represents interferon-gamma stimulation on blood samples using antigens based on the SARS-CoV-2 spike protein ([https://www.coronavirus-diagnostics.com/documents/Indications/Infections/Coronavirus/ET\\_2606\\_D\\_UK\\_A.pdf](https://www.coronavirus-diagnostics.com/documents/Indications/Infections/Coronavirus/ET_2606_D_UK_A.pdf)), and y-axis represents SARS-CoV-2 spike protein antibodies in dried-blood spot samples. The two variables had a Spearman correlation of 0.508. Smoothed curves and 95% confidence intervals were obtained using locally weighted scatterplot smoothing with span parameter of 0.8.<sup>10</sup>

**Table S1. Sample characteristics and representativeness of phases 4 and 6 for online surveys and DBS samples**

|                                                        | 2016 Canadian Census or national surveys | Phase 4 Survey |       | Phase 4 DBS sample |       | Phase 6 Survey |       | Phase 6 DBS sample |       |
|--------------------------------------------------------|------------------------------------------|----------------|-------|--------------------|-------|----------------|-------|--------------------|-------|
|                                                        |                                          | n              | %     | n                  | %     | n              | %     | n                  | %     |
| <b>Total (N)</b>                                       |                                          | 14224          |       | 5031               |       | 10088          |       | 3378               |       |
| <b>High risk regions*</b>                              |                                          | 4824           | 33.6% | 1732               | 34.0% | 3530           | 34.6% | 1164               | 33.5% |
| <b>Province</b>                                        |                                          |                |       |                    |       |                |       |                    |       |
| <b>Ontario</b>                                         | 38%                                      | 5707           | 40.0% | 2103               | 41.5% | 3957           | 39.3% | 1417               | 41.6% |
| <b>British Columbia &amp; Yukon</b>                    | 14%                                      | 2862           | 20.1% | 1035               | 20.9% | 2120           | 21.1% | 732                | 22.4% |
| <b>Quebec</b>                                          | 23%                                      | 1764           | 12.5% | 617                | 12.2% | 1223           | 12.0% | 364                | 10.5% |
| <b>Prairie provinces &amp; NWT</b>                     | 19%                                      | 2992           | 21.1% | 979                | 19.6% | 2155           | 21.5% | 653                | 19.4% |
| <b>Atlantic provinces</b>                              | 7%                                       | 899            | 6.2%  | 297                | 5.9%  | 633            | 6.2%  | 212                | 6.2%  |
| <b>Sex</b>                                             |                                          |                |       |                    |       |                |       |                    |       |
| <b>Male</b>                                            | 49%                                      | 6453           | 45.9% | 1997               | 40.1% | 4492           | 45.0% | 1271               | 37.8% |
| <b>Female</b>                                          | 51%                                      | 7628           | 53.1% | 3003               | 59.3% | 5515           | 54.2% | 2089               | 61.7% |
| <b>Prefer to self-describe</b>                         |                                          | 143            | 1.0%  | 31                 | 0.6%  | 81             | 0.8%  | 18                 | 0.6%  |
| <b>Age group</b>                                       |                                          |                |       |                    |       |                |       |                    |       |
| <b>18-39 years</b>                                     | 49%                                      | 3632           | 23.9% | 1060               | 19.5% | 2084           | 19.1% | 512                | 13.8% |
| <b>40-59 years</b>                                     | 28%                                      | 5195           | 36.1% | 1752               | 34.4% | 3699           | 35.9% | 1134               | 32.7% |
| <b>60-69 years</b>                                     | 12%                                      | 3303           | 24.5% | 1355               | 28.3% | 2484           | 26.1% | 994                | 30.7% |
| <b>70+ years</b>                                       | 11%                                      | 2094           | 15.5% | 864                | 17.9% | 1821           | 18.9% | 738                | 22.8% |
| <b>Education</b>                                       |                                          |                |       |                    |       |                |       |                    |       |
| <b>Some college or less</b>                            | 45%                                      | 3372           | 34.0% | 1050               | 30.6% | 2395           | 34.3% | 702                | 30.7% |
| <b>College graduate</b>                                | 32%                                      | 4680           | 31.6% | 1621               | 31.5% | 3333           | 32.1% | 1102               | 32.3% |
| <b>University graduate</b>                             | 23%                                      | 6172           | 34.4% | 2360               | 37.9% | 4360           | 33.6% | 1574               | 37.0% |
| <b>Visible minority</b>                                | 22%                                      | 3438           | 23.5% | 820                | 15.8% | 2482           | 24.2% | 525                | 15.3% |
| <b>Indigenous</b>                                      | 5%                                       | 1504           | 11.0% | 495                | 10.2% | 803            | 8.6%  | 234                | 7.3%  |
| <b>Household size</b>                                  |                                          |                |       |                    |       |                |       |                    |       |
| <b>Live alone</b>                                      | 28%                                      | 2614           | 18.7% | 990                | 19.7% | 2070           | 20.8% | 730                | 21.5% |
| <b>Two people</b>                                      | 34%                                      | 6144           | 44.0% | 2328               | 47.0% | 4475           | 45.2% | 1635               | 49.4% |
| <b>Three people</b>                                    | 15%                                      | 2338           | 16.2% | 747                | 14.8% | 1558           | 15.2% | 477                | 14.0% |
| <b>Four people or more</b>                             | 22%                                      | 3128           | 21.2% | 966                | 18.5% | 1985           | 18.8% | 536                | 15.2% |
| <b>Ever smoking</b>                                    | 54%                                      | 6652           | 49.8% | 2331               | 49.1% | 4781           | 50.6% | 1599               | 50.4% |
| <b>Obesity (<math>\geq 30</math> kg/m<sup>2</sup>)</b> | 27%                                      | 3750           | 27.4% | 1368               | 28.1% | 2675           | 27.7% | 908                | 27.8% |
| <b>Diabetic history</b>                                | 9%                                       | 1418           | 10.6% | 518                | 11.0% | 1037           | 10.9% | 359                | 11.4% |
| <b>Hypertension history</b>                            | 23%                                      | 3826           | 28.4% | 1452               | 30.4% | 2850           | 29.7% | 1006               | 31.3% |
| <b>Vaccination†</b>                                    |                                          |                |       |                    |       |                |       |                    |       |
| <b>Unvaccinated</b>                                    | 10%                                      | 1275           | 9.7%  | 209                | 4.5%  | 739            | 7.9%  | 95                 | 3.1%  |
| <b>Vaccinated</b>                                      | 90%                                      | 12949          | 90.3% | 4819               | 95.5% | 9349           | 92.1% | 3283               | 96.9% |
| <b>One dose</b>                                        | 1%                                       | 136            | 1.1%  | 23                 | 0.5%  | 76             | 0.8%  | 10                 | 0.3%  |
| <b>Two doses</b>                                       | 29%                                      | 3807           | 29.9% | 876                | 18.5% | 1246           | 13.0% | 233                | 7.2%  |
| <b>Three doses</b>                                     | 32%                                      | 9006           | 69.0% | 3920               | 81.0% | 3801           | 37.2% | 1158               | 34.0% |
| <b>Four or more doses</b>                              | 28%                                      |                |       |                    |       | 4226           | 41.1% | 1882               | 55.5% |

\*17 high-burden regions identified from a regression analysis of SARS-CoV-2 case counts

†As of 1 January 2023

Broadly, the characteristics of the cohort did not change materially between phase 3 and 4 and phase 6, such as in the persistent underrepresentation of lesser educated Canadian adults.<sup>2</sup>

## STROBE Statement

|                           | Item No. | Recommendation                                                                                                                                                                                | Relevant text from manuscript (page no.)                                                                                                                                                                                                                                                                                                                                                                                                                                                                                                           |
|---------------------------|----------|-----------------------------------------------------------------------------------------------------------------------------------------------------------------------------------------------|----------------------------------------------------------------------------------------------------------------------------------------------------------------------------------------------------------------------------------------------------------------------------------------------------------------------------------------------------------------------------------------------------------------------------------------------------------------------------------------------------------------------------------------------------|
| <b>Title and abstract</b> | 1        | (a) Indicate the study’s design with a commonly used term in the title or the abstract<br>(b) Provide in the abstract an informative and balanced summary of what was done and what was found | cohort study (1)<br>Abstract – Main outcome measures and Results sections (2)                                                                                                                                                                                                                                                                                                                                                                                                                                                                      |
| <b>Introduction</b>       |          |                                                                                                                                                                                               |                                                                                                                                                                                                                                                                                                                                                                                                                                                                                                                                                    |
| Background/rationale      | 2        | Explain the scientific background and rationale for the investigation being reported                                                                                                          | Epidemiological studies have identified hybrid immunity as partially protective against infection or reinfection, and more strongly protective against hospitalization, severe disease, or death. However, such studies rely on the follow-up of hospitalized patients or those with access to PCR-based testing, and not randomly selected populations. Thus, the contribution of infection and vaccination to hybrid immunity and the duration of immunity from either exposure remain remarkably poorly documented at the population level. (3) |
| Objectives                | 3        | State specific objectives, including any prespecified hypotheses                                                                                                                              | [W]e estimate cumulative SARS-CoV-2 incidence among Canadian adults in 2020 and 2021 - prior to the omicron period - and during two major omicron waves (BA.1/1.1 and BA.2 and BA.5) in 2022. We assess declines in active immunity and changes over time in age-specific active immunity levels based on prior infection and concurrent vaccination. (3)                                                                                                                                                                                          |
| <b>Methods</b>            |          |                                                                                                                                                                                               |                                                                                                                                                                                                                                                                                                                                                                                                                                                                                                                                                    |
| Study design              | 4        | Present key elements of study design early in the paper                                                                                                                                       | [Ab-C] conducted six serial assessments of SARS-CoV-2 symptoms and seropositivity, with five surveys covering about 4000-9000 adults. [...] Sinai Health in Toronto conducted highly sensitive and specific chemiluminescence-based enzyme-linked immunosorbent assays (3,4)                                                                                                                                                                                                                                                                       |
| Setting                   | 5        | Describe the setting, locations, and relevant dates, including periods of recruitment, exposure, follow-up, and data collection                                                               | We surveyed 10 088 adults in Phase 6 of Ab-C, of whom 4025 provided DBS from 26 September to 21 November 2022, and of whom 3378 provided both surveys and DBS (4)                                                                                                                                                                                                                                                                                                                                                                                  |
| Participants              | 6        | (a) Give the eligibility criteria, and the sources and methods of selection of participants. Describe methods of follow-up                                                                    | Nationwide polling panel of Canadian adults aged 18 and older [...] The sampled population was stratified by [age, sex, education,] and region, by census metropolitan area to match the national demographic distribution (supplementary methods)                                                                                                                                                                                                                                                                                                 |
|                           |          | (b) For matched studies, give matching criteria and number of exposed and unexposed                                                                                                           | NA                                                                                                                                                                                                                                                                                                                                                                                                                                                                                                                                                 |
| Variables                 | 7        | Clearly define all outcomes, exposures, predictors, potential confounders, and effect modifiers. Give diagnostic criteria, if applicable                                                      | The online survey assessed demographic characteristics, history of smoking, hypertension, obesity (self-reported height and weight), diabetes, and experience with SARS-CoV-2 infection symptoms and PCR or rapid antigen testing [...] Sinai Health in Toronto conducted highly sensitive and specific chemiluminescence-based enzyme-linked immunosorbent assays targeting the spike protein, RBD, and N (4)                                                                                                                                     |
| Data sources/measurement  | 8*       | For each variable of interest, give sources of data and details of methods of assessment (measurement). Describe comparability of assessment methods if there is more than one group          | See no. 6.                                                                                                                                                                                                                                                                                                                                                                                                                                                                                                                                         |
| Bias                      | 9        | Describe any efforts to address potential sources of bias                                                                                                                                     | N-positivity may have underestimated actual infection because mild cases among vaccinated adults did not mount an antibody response or                                                                                                                                                                                                                                                                                                                                                                                                             |

|                        |     |                                                                                                                                                                                                                |                                                                                                                                                                                                                                                                                                                                                                                                                                                                           |
|------------------------|-----|----------------------------------------------------------------------------------------------------------------------------------------------------------------------------------------------------------------|---------------------------------------------------------------------------------------------------------------------------------------------------------------------------------------------------------------------------------------------------------------------------------------------------------------------------------------------------------------------------------------------------------------------------------------------------------------------------|
|                        |     |                                                                                                                                                                                                                | because people did not seroconvert during the sampling period. (6)                                                                                                                                                                                                                                                                                                                                                                                                        |
| Study size             | 10  | Explain how the study size was arrived at                                                                                                                                                                      | NA                                                                                                                                                                                                                                                                                                                                                                                                                                                                        |
| Quantitative variables | 11  | Explain how quantitative variables were handled in the analyses. If applicable, describe which groupings were chosen and why                                                                                   | IgG serology, Determining positivity, and Epidemiological analyses sections (supplementary methods)                                                                                                                                                                                                                                                                                                                                                                       |
| Statistical methods    | 12  | (a) Describe all statistical methods, including those used to control for confounding                                                                                                                          | We obtained the overall cumulative incidence of SARS-CoV-2 infections based on N positivity and derived the 95% confidence intervals using the delta method. (supplementary methods)                                                                                                                                                                                                                                                                                      |
|                        |     | (b) Describe any methods used to examine subgroups and interactions                                                                                                                                            | For each phase, we fit a logistic regression model which included vaccination status (no doses v. one or more) and region (British Columbia and Yukon; Prairie provinces, NWT, Nunavut; Ontario; Quebec; Atlantic provinces), each of which are interacted with age and sex (and the age-sex interaction). We did not interact vaccination status with region, as the number of unvaccinated individuals in the sample was small in some regions. (supplementary methods) |
|                        |     | (c) Explain how missing data were addressed                                                                                                                                                                    | NA                                                                                                                                                                                                                                                                                                                                                                                                                                                                        |
|                        |     | (d) If applicable, explain how loss to follow-up was addressed                                                                                                                                                 | NA                                                                                                                                                                                                                                                                                                                                                                                                                                                                        |
|                        |     | (e) Describe any sensitivity analyses                                                                                                                                                                          | [A] comparison of those invited who participated and did not in Phase 1 of the study showed a bias towards greater female participation. However, differences by sex were not important predictors of cumulative incidence (supplementary methods)                                                                                                                                                                                                                        |
| <b>Results</b>         |     |                                                                                                                                                                                                                |                                                                                                                                                                                                                                                                                                                                                                                                                                                                           |
| Participants           | 13* | (a) Report numbers of individuals at each stage of study—e.g. numbers potentially eligible, examined for eligibility, confirmed eligible, included in the study, completing follow-up, and analyzed            | Figure S1                                                                                                                                                                                                                                                                                                                                                                                                                                                                 |
|                        |     | (b) Give reasons for non-participation at each stage                                                                                                                                                           | Figure S1                                                                                                                                                                                                                                                                                                                                                                                                                                                                 |
|                        |     | (c) Consider use of a flow diagram                                                                                                                                                                             | Figure S1                                                                                                                                                                                                                                                                                                                                                                                                                                                                 |
| Descriptive data       | 14* | (a) Give characteristics of study participants (e.g. demographic, clinical, social) and information on exposures and potential confounders                                                                     | Table S1                                                                                                                                                                                                                                                                                                                                                                                                                                                                  |
|                        |     | (b) Indicate number of participants with missing data for each variable of interest                                                                                                                            | Figure S1                                                                                                                                                                                                                                                                                                                                                                                                                                                                 |
|                        |     | (c) Summarize follow-up time (e.g., average and total amount)                                                                                                                                                  | Figure 1                                                                                                                                                                                                                                                                                                                                                                                                                                                                  |
| Outcome data           | 15* | Report numbers of outcome events or summary measures over time                                                                                                                                                 | Figure 1, Figure S1                                                                                                                                                                                                                                                                                                                                                                                                                                                       |
| Main results           | 16  | (a) Give unadjusted estimates and, if applicable, confounder-adjusted estimates and their precision (e.g., 95% confidence interval). Make clear which confounders were adjusted for and why they were included | Lack of vaccination and lower education were correlated (supplementary methods), so we adjusted cumulative incidence for vaccination status. (4)<br>Post-stratified for geographic region, age, sex, and vaccination status to derive the mean estimate. (Table 1)                                                                                                                                                                                                        |
|                        |     | (b) Report category boundaries when continuous variables were categorized                                                                                                                                      | NA                                                                                                                                                                                                                                                                                                                                                                                                                                                                        |
|                        |     | (c) If relevant, consider translating estimates of relative risk into absolute risk for a meaningful time period                                                                                               | NA                                                                                                                                                                                                                                                                                                                                                                                                                                                                        |
| Other analyses         | 17  | Report other analyses done—e.g. analyses of subgroups and interactions, and sensitivity analyses                                                                                                               | NA                                                                                                                                                                                                                                                                                                                                                                                                                                                                        |
| <b>Discussion</b>      |     |                                                                                                                                                                                                                |                                                                                                                                                                                                                                                                                                                                                                                                                                                                           |
| Key results            | 18  | Summarize key results with reference to study objectives                                                                                                                                                       | Applying the Ab-C results, after standardizing for vaccination status, region, age, and sex to the national profile of Canadian adult population,                                                                                                                                                                                                                                                                                                                         |

|                          |    |                                                                                                                                                                            |                                                                                                                                                                                                                                                                                                                                                                                                                                                                                                                                                                                                   |
|--------------------------|----|----------------------------------------------------------------------------------------------------------------------------------------------------------------------------|---------------------------------------------------------------------------------------------------------------------------------------------------------------------------------------------------------------------------------------------------------------------------------------------------------------------------------------------------------------------------------------------------------------------------------------------------------------------------------------------------------------------------------------------------------------------------------------------------|
|                          |    |                                                                                                                                                                            | yielded estimates of cumulative incidence of SARS-CoV-2 infection rising from about 13% before omicron to 78% by December 2022. This equates to about 25 million infected adults cumulatively. (5)                                                                                                                                                                                                                                                                                                                                                                                                |
| Limitations              | 19 | Discuss limitations of the study, taking into account sources of potential bias or imprecision. Discuss both direction and magnitude of any potential bias                 | [W]e deliberately focused on distributions of antibody levels which overlap in the comparison categories, but this has the benefit of showing the full range of spike antibody response in the various strata of the infected and vaccinated. We may be under-estimating spike antibody levels due to assay saturation. N-positivity may have underestimated actual infection because mild cases among vaccinated adults did not mount an antibody response or because people did not seroconvert during the sampling period. Conversely, some adults may have reverted to N-negative status. (7) |
| Interpretation           | 20 | Give a cautious overall interpretation of results considering objectives, limitations, multiplicity of analyses, results from similar studies, and other relevant evidence | We demonstrate the protective nature of hybrid immunity at a population level using robust biological markers of cumulative infection paired with viral testing. While steps to protect individuals and populations from SARS-CoV-2 infection should continue to be implemented, close to 80% of Canadian adults became infected, mostly from the omicron variants, by December 2022. (6)                                                                                                                                                                                                         |
| Generalizability         | 21 | Discuss the generalizability (external validity) of the study results                                                                                                      | Study participants were comparable to Canadian adults in prevalence of obesity, smoking, diabetes, and vaccination, but fewer lower-education adults participated (5)                                                                                                                                                                                                                                                                                                                                                                                                                             |
| <b>Other information</b> |    |                                                                                                                                                                            |                                                                                                                                                                                                                                                                                                                                                                                                                                                                                                                                                                                                   |
| Funding                  | 22 | Give the source of funding and the role of the funders for the present study and, if applicable, for the original study on which the present article is based              | Funding was provided by the COVID-19 Immunity Task Force, Canadian Institutes of Health Research, Pfizer Global Medical Grants, and St. Michael's Hospital Foundation. (8)                                                                                                                                                                                                                                                                                                                                                                                                                        |

## Acknowledgments

We thank the thousands of Canadians who participated in the Action to Beat Coronavirus study. A full listing for the Ab-C Study Collaborators is available at [www.abcstudy.ca](http://www.abcstudy.ca).

## Supplementary references

1. Angus Reid Institute. How we poll. <http://angusreid.org/how-we-poll-ari/> (accessed 17 December 2020).
2. Tang X, Sharma A, Pasic M, et al. Assessment of SARS-CoV-2 seropositivity during the first and second viral waves in 2020 and 2021 among Canadian adults. *JAMA Netw Open* 2022;5:e2146798.
3. Action to Beat Coronavirus Study. Participant Information Sheet. [https://abcstudy.ca/docs/abcstudy\\_information.pdf](https://abcstudy.ca/docs/abcstudy_information.pdf) (accessed 25 November 2021).
4. Isho B, Abe KT, Zuo M, et al. Persistence of serum and saliva antibody responses to SARS-CoV-2 spike antigens in patients with COVID-19. *Sci Immunol* 2020;5:eabe5511.
5. Colwill K, Galipeau Y, Stuiblé M, et al. A scalable serology solution for profiling humoral immune responses to SARS-CoV-2 infection and vaccination. *Clin Transl Immunology* 2022;11:e1380.
6. Public Health Agency of Canada. COVID-19 epidemiology update. Ottawa, ON: Public Health Agency of Canada, 2023. <https://health-infobase.canada.ca/covid-19/> (accessed 3 February 2023).
7. Jackson C. delta method: The delta method. In: msm: Multi-State Markov and Hidden Markov Models in Continuous Time. <https://rdrr.io/cran/msm/man/deltamethod.html> (accessed 3 February 2023).
8. Tang X, Gelband H, Nagelkerke N, et al. Action to beat coronavirus/Action pour battre le coronavirus (Ab-C) Study Investigators. COVID-19 vaccination intention during early vaccine rollout in Canada: a nationwide online survey. *Lancet Reg Health Am* 2021;2:100055.
9. Brown PE, Fu SH, Bansal A, et al. Ab-C Study Collaborators. Omicron BA.1/1.1 SARS-CoV-2 infection among vaccinated Canadian adults. *New Engl J Med* 2022;386:2337-9.
10. Fox J, Weisberg S. An R companion to applied regression. Thousand Oaks, CA: Sage Publications; 2018.
